# Supplementary material
Source: ML conference proceedings conference paper supplement (https://openreview.net/forum?id=SpStmVboGy)
Supplement: supplementary_material [file attachment]

---

# Solving a Class of Non-Convex Minimax Optimization in Federated Learning

---

**Xidong Wu**<sup>†</sup>

Electrical and Computer Engineering  
University of Pittsburgh  
Pittsburgh, PA 15213  
xidong\_wu@outlook.com

**Jianhui Sun**<sup>†</sup>

Computer Science  
University of Virginia  
Charlottesville, VA 22903  
js9gu@virginia.edu

**Zhengmian Hu**

Computer Science  
University of Maryland  
College Park, MD 20742  
huzhengmian@gmail.com

**Aidong Zhang**<sup>§</sup>

Computer Science  
University of Virginia  
Charlottesville, VA 22903  
aidong@virginia.edu

**Heng Huang**<sup>\*</sup>

Computer Science  
University of Maryland  
College Park, MD 20742  
henghuanghh@gmail.com

## Abstract

The minimax problems arise throughout machine learning applications, ranging from adversarial training and policy evaluation in reinforcement learning to AUROC maximization. To address the large-scale distributed data challenges across multiple clients with communication-efficient distributed training, federated learning (FL) is gaining popularity. Many optimization algorithms for minimax problems have been developed in the centralized setting (*i.e.*, single-machine). Nonetheless, the algorithm for minimax problems under FL is still underexplored. In this paper, we study a class of federated nonconvex minimax optimization problems. We propose FL algorithms (FedSGDA+ and FedSGDA-M) and reduce existing complexity results for the most common minimax problems. For nonconvex-concave problems, we propose FedSGDA+ and reduce the communication complexity to  $O(\varepsilon^{-6})$ . Under nonconvex-strongly-concave and nonconvex-PL minimax settings, we prove that FedSGDA-M has the best-known sample complexity of  $O(\kappa^3 N^{-1} \varepsilon^{-3})$  and the best-known communication complexity of  $O(\kappa^2 \varepsilon^{-2})$ . FedSGDA-M is the first algorithm to match the best sample complexity  $O(\varepsilon^{-3})$  achieved by the single-machine method under the nonconvex-strongly-concave setting. Extensive experimental results on fair classification and AUROC maximization show the efficiency of our algorithms.

## 1 Introduction

The nonconvex minimax optimization has been actively applied to solve enormous machine learning problems, such as adversarial training [56, 61], generative adversarial networks (GANs) [16, 18], policy evaluation in reinforcement learning [55, 22, 25], robust optimization [11, 60], AUROC (area under the ROC curve) maximization [39], *etc.* Many single-machine minimax optimization algorithms have been proposed to address these problems.

---

<sup>†</sup>Equal contribution

<sup>§</sup>This work was partially supported by NSF CNS 2213700 and CCF 2217071 at UVA.

<sup>\*</sup>This work was partially supported by NSF IIS 1838627, 1837956, 1956002, 2211492, CNS 2213701, CCF 2217003, DBI 2225775 at Pitt and UMD.

Machine learning tasks with large-scale distributed datasets call for distributed training [3] because of its ability to shorten the calculation time and train models with data from various locations. At the same time, communication overhead has emerged as the most restrictive bottleneck of distributed training due to the increasing model and data size. To tackle these issues, federated learning (FL) [44] has emerged as a promising technique since it makes use of distributed data from different clients, avoids frequent transmission between clients and the central server, and preserves data privacy. In FL, clients train and update their models locally, and the server aggregates and averages the model parameters from all clients periodically. Only models are shared among clients and the training data are stored locally, which provides a certain level of data privacy. In addition, FL also enhances computation power since it utilizes many clients to train models.

Although federated learning has gained popularity, most existing works focus on the standard stochastic minimization problem [33, 48, 34, 36, 71, 58, 70, 72]. Recently, some algorithms for non-minimization optimization in FL are proposed [53, 21, 15, 50, 59]. However, existing FL minimax algorithms have not achieved the complexity level reached by single-machine algorithms. To bridge this gap, we consider the federated nonconvex minimax optimization problem as follows:

$$\min_{x \in \mathbb{R}^{d_1}} \max_{y \in \mathbb{R}^{d_2}} \left\{ F(x, y) = \frac{1}{N} \sum_{i=1}^N f_i(x, y) \right\} \quad (1)$$

where the function  $f_i(x, y) = \mathbb{E}_{\xi_i \sim \mathcal{D}_i} [f_i(x, y; \xi_i)] : \mathbb{R}^{d_1} \times \mathbb{R}^{d_2} \rightarrow \mathbb{R}$  is the loss function of the  $i^{\text{th}}$  client. We restrict our focus to the non-convex minimax problem, where  $f_i(x, y)$  is nonconvex over  $x \in \mathbb{R}^{d_1}$  and concave or nonconcave over  $y \in \mathbb{R}^{d_2}$ .  $N$  is the total number of clients.  $\xi_i = (x_i, y_i) \sim \mathcal{D}_i$  denotes data point  $\xi_i$  is sampled from the local data distribution  $\mathcal{D}_i$  on machine  $i$ . In this paper, heterogeneous datasets are considered, namely,  $\mathcal{D}_i$  and  $\mathcal{D}_j$  ( $i \neq j$ ) are not identical.

Some recent works have attempted to solve federated minimax optimization for convex-concave setting [11, 26, 52]. Due to the popularity of deep neural networks, nonconvex minimax has wider applications. More recently, some works [50, 53, 10, 19, 67] extend single-machine algorithms, such as SGDA, to federated learning settings for nonconvex minimax optimization. However, theoretical understandings of federated minimax optimization remain limited in the literature. In the context of stochastic smooth nonconvex minimax problems, their analysis either relies on strict assumptions [19] or achieves suboptimal convergence results [50]. For example, single-machine methods [42, 28] achieve  $O(\kappa^3 \varepsilon^{-3})$  under nonconvex-strongly-concave setting, which is much better than  $O(\kappa^4 \varepsilon^{-4})$  achieved by the best FL minimax algorithm [50, 63] in existing literature. Therefore, a natural question arises:

**Can we design stochastic gradient decent ascent methods with better sample and communication complexities to match the convergence rate of single-machine counterparts for solving the problem (1)?**

In this paper, we provide an affirmative answer to the aforementioned question and propose a class of algorithms to solve the problem (1) under different settings. In particular, we consider three most common classes of nonconvex minimax optimization problems: 1) NC-C: NonConvex in  $x$ , Concave in  $y$ ; 2) NC-SC: NonConvex in  $x$ , Strongly-Concave in  $y$ ; 3) NC-PL: NonConvex in  $x$ , PL-condition in  $y$ . For each of these problems, we propose a new algorithm with provably better convergence rate (please see Table 1) and provide a theoretical analysis. Our main contributions are four-fold:

- 1) NC-C setting. We propose FedSGDA+, and prove it has sample complexity of  $O(N^{-1} \varepsilon^{-8})$  and communication complexity of  $O(\varepsilon^{-6})$ . FedSGDA+ takes advantage of the structure of FL by adding the global learning rate at the server and reduces communication complexity to  $O(\varepsilon^{-6})$  from  $O(\varepsilon^{-7})$  in [50]. It also achieves a linear speedup to the number of clients.
- 2) NC-PL setting. We propose a federated stochastic gradient ascent (FedSGDA-M) algorithm with the momentum-based variance reduction technique. It has the best sample complexity of  $O(\kappa^3 N^{-1} \varepsilon^{-3})$  and the best communication complexity of  $O(\kappa^2 \varepsilon^{-2})$ . Compared with existing momentum-based variance reduction algorithms, our result employs a novel theoretical analysis framework that produces a tighter convergence rate (i.e., our rate gets rid of a logarithmic term appearing in existing works).
- 3) NC-SC setting. FedSGDA-M can be directly applied to the NC-SC setting since the PL condition is weaker than strong-concavity. Our algorithm is the first work to reach sample

Table 1: Complexity comparison of existing nonconvex federated minimax algorithms for finding an  $\varepsilon$ -stationary point. Sample complexity is the total number of the First-order Oracle (IFO) to reach an  $\varepsilon$ -stationary point. Communication complexity denotes the total number of back-and-forth communication times between clients and the server. Here,  $N$  is the number of clients, and  $\kappa = L_f/\mu$  is the condition number.

| Type                       | Algorithm           | Reference | Sample                               | Communication                 |
|----------------------------|---------------------|-----------|--------------------------------------|-------------------------------|
| Nonconvex concave          | Local SGDA+         | [50]      | $O(N^{-1}\varepsilon^{-8})$          | $O(\varepsilon^{-7})$         |
|                            | FedSGDA+            | Ours      | $O(N^{-1}\varepsilon^{-8})$          | $O(\varepsilon^{-6})$         |
| Nonconvex Strongly Concave | Local SGDA          | [50]      | $O(\kappa^4 N^{-1}\varepsilon^{-4})$ | $O(\kappa^3\varepsilon^{-3})$ |
|                            | Momentum Local SGDA | [50]      | $O(\kappa^4 N^{-1}\varepsilon^{-4})$ | $O(\kappa^3\varepsilon^{-3})$ |
|                            | FEDNEST             | [53]      | $O(\kappa^3\varepsilon^{-4})^a$      | $O(\kappa^2\varepsilon^{-4})$ |
|                            | FedSGDA             | Ours      | $O(\kappa^3 N^{-1}\varepsilon^{-3})$ | $O(\kappa^2\varepsilon^{-2})$ |
| Nonconvex PL               | Local SGDA          | [50]      | $O(\kappa^4 N^{-1}\varepsilon^{-4})$ | $O(\kappa^3\varepsilon^{-3})$ |
|                            | Momentum Local SGDA | [50]      | $O(\kappa^4 N^{-1}\varepsilon^{-4})$ | $O(\kappa^3\varepsilon^{-3})$ |
|                            | SAGDA               | [63]      | $O(N^{-1}\varepsilon^{-4})$          | $O(\varepsilon^{-2})^b$       |
|                            | FedSGDA             | Ours      | $O(\kappa^3 N^{-1}\varepsilon^{-3})$ | $O(\kappa^2\varepsilon^{-2})$ |

<sup>a</sup> Their theoretical analysis does not report the dependency on  $N$ .

<sup>b</sup> Their theoretical analysis does not report the dependency on  $\kappa$ .

complexity of  $O(\varepsilon^{-3})$  in federated learning. In addition, FedSGDA-M does not rely on a large batch size to reach optimal sample complexity compared with single-machine minimax algorithms [29, 42].

- Extensive experimental results on fair classification and AUROC maximization confirm the effectiveness of our proposed algorithm.

## 2 Related Work

### 2.1 Single-Machine Minimax

**Nonconvex-Concave (NC-C) setting.** [31, 46, 45, 54, 35] proposed various deterministic and stochastic algorithms to solve the NC-C minimax problems. All of these algorithms, however, have a double-loop structure and are thus relatively complicated to implement. They decouple the minimax problem into a minimization problem and a maximization problem and use a nested loop to update variable  $y$  while keeping variable  $x$  constant. Subsequently, [38] studied the complexity result of the single-loop algorithm (SGDA) for the NC-C minimax problem and proves the stochastic algorithm achieves  $O(\varepsilon^{-8})$  complexity. SGDA is a direct extension of SGD from minimization optimization to minimax optimization problems. Recently, [43] providing a unified analysis for the convergence of OGDA and EG methods in the nonconvex-strongly-concave (NC-SC) and nonconvex-concave (NC-C) settings.

**Nonconvex-Strongly-Concave (NC-SC) setting.** [38] analyzed the stochastic gradient descent ascent (SGDA) algorithm and proved that SGDA has  $O(\kappa^3\varepsilon^{-4})$  stochastic gradient complexity. To reduce the convergence rate, [42] proposed a stochastic GDA algorithm (i.e. SREDA) with a double-loop structure based on the variance reduction technique of SPIDER [13] and reduce the complexity to  $O(\kappa^3\varepsilon^{-3})$ . [29] used momentum-based variance reduction technique of STORM [7] and proposed Acc-MDA. Acc-MDA is a single-loop algorithm, which gets the same convergence result as SREDA. Furthermore, adaptive minimax algorithms are introduced [28, 30] to solve the nonsmooth nonconvex-strongly-concave minimax problems based on dynamic mirror functions. [65] used a nested adaptive framework to design parameter-agnostic nonconvex minimax algorithm. [69] proves that VR-based SAPD+ has the complexity of  $O(\kappa^2\varepsilon^{-3})$ . However, whether the best convergence result of  $O(\varepsilon^{-3})$  in single-machine methods can be achieved in the federated setting is an open question. In addition, [23] conducts an in-depth investigation of limitations of GDA algorithm (e.g., smaller learning rate, cycling/divergence issue) and gives a systematic analysis of how to improve GDA dynamics.

**Nonconvex-Nonconcave (NC-NC) setting.** There is extensive research on NC-NC problems [12] and the Nonconvex-PL condition is a special class of functions that interests us the most. Polyak-Łojasiewicz (PL) condition does not require the objective to be concave and recent works show that the PL condition could hold in the training process of overparameterized neural networks with random initialization [1, 5]. Recently, many deterministic methods [45, 64, 14] are proposed for NC-NC problems under the NC-PL setting. [20] proposed a PDAda method for Nonconvex-PL minimax optimization with the restriction of the concavity condition, and [6] focuses on the finite-sum Nonconvex-PL minimax optimization. Stochastic alternating GDA and stochastic smoothed GDA proposed in [66] achieve complexity of  $O(\kappa^4 \varepsilon^{-4})$  and  $O(\kappa^2 \varepsilon^{-4})$ , respectively.

## 2.2 Distributed/Federated Minimax

Distributed training has rapid development in minimax optimization in recent years, driven by the need to train large-scale datasets [40]. Under the serverless decentralized setting, algorithms for nonconvex minimax have been studied extensively in nonconvex-strongly-concave setting [4, 62, 68, 41, 57] and nonconvex-PL setting [27].

In the FL setting, some works analyzed algorithms for convex-concave problems [11, 37, 26, 52]. However, as nonconvex models (e.g., deep neural networks) being more and more prevalent, there is a growing need for federated nonconvex minimax optimization, such as federated adversarial training [49], federated deep AUROC maximization [19] and federated GAN [47]. [19] and [67] focus on imbalanced data tasks. They reformulated the AUROC maximization problem as the minimax problem under the FL setting. But their analysis relies on strict assumptions that deep models satisfy the PL condition and only focuses on PL-strong-concave minimax. [49] converted the robust federated learning into the minimax problem, where only model parameters, namely min variables, are exchanged among clients via the server. [10] proposed Local SGDA and Local SGDA+. Local SGDA is the local-update version of the SGDA algorithm in FL. Different from local SGDA, in local SGDA+, max variable  $y$  is updated with a constant min variable  $\tilde{x}$  and the snapshot  $\tilde{x}$  updates every  $S$  iteration. Afterward, [50] improves sample complexity and communication complexity of Local SGDA for NC-SC and NC-PL settings, and Local SGDA+ for NC-C setting. [50] also proposes a Momentum Local SGDA, which achieves the same theoretical results as Local SGDA for NC-PL and NC-SC settings. In addition, [53] designs FEDNEST with two nested loops. Although FEDNEST is composed of FEDINN (a federated stochastic variance reduction algorithm), their convergence complexity is not improved over vanilla Local SGDA. Afterward, [63] proposes SAGDA under NC-PL setting, which yields a better communication complexity (i.e.,  $O(\varepsilon^{-2})$ ). However, its analysis does not consider the effect of condition number  $\kappa$ . More recently, [51] considers federated minimax optimization with Client Heterogeneity in nonconvex concave and nonconvex strongly-concave settings.

**Relation to Existing Works.** We propose FedSGDA+ for NC-C setting and FedSGDA-M for NC-SC and NC-PL settings. In NC-C setting, we discover that the addition of a global step size leads to better communication complexity. Under this circumstance, theoretical analysis is more challenging as we not only need to consider the complicated structure of the minimax problem but also need to handle the local update and global update separately. For FedSGDA-M, we relax the requirement of step size (specifically designed unnatural step size is often required in STORM-like approaches [7, 34]), which requires novel proof techniques to obtain. Thus our result does not contain a logarithmic term and provides a tighter convergence rate (Seen in contributions 1 in [34]). In addition, with different theoretical frameworks, our better sample complexity doesn't rely on a big batch size, while the single-machine minimax algorithm with variance reduction (Acc-MDA) in [29] (Table 2) needs a large batch to achieve the same sample complexity.

## 3 Algorithms and Convergence Analysis

Notation:  $\|\cdot\|$  denotes the  $\ell_2$  norm for vectors.  $a = O(b)$  denotes that  $a \leq Cb$  for some constant  $C > 0$ . Given the mini-batch samples  $\mathcal{B} = \{\xi_j\}_{j=1}^b$ , we let  $\nabla f_i(x, y; \mathcal{B}) = \frac{1}{b} \sum_{j=1}^b \nabla f_i(x, y; \xi_j)$ .

**Assumption 3.1.** (i) Unbiased Gradient. The gradient of each component function  $f_i(x, y; \xi)$  computed at each client is unbiased for all  $\xi^{(i)} \sim \mathcal{D}_i, i \in [N]$ :

$$\mathbb{E}[\nabla f_i(x, y; \xi^{(i)})] = \nabla f_i(x, y),$$

---

**Algorithm 1** FedSGDA+ Algorithm

---

```
1: Input:  $T$ , local step sizes  $\hat{c}, c$ , global step sizes  $\eta_x, \eta_y$ ,  $k = 0$ , numbers of inner updates  $Q$  and
   outer update  $S$ , and mini-batch size  $b$ ,  $N$  clients;
2: Initialize:  $x_0^i = \tilde{x}_0 = \bar{x}_0, y_0^i = \bar{y}_0$ ,
3: for  $t = 0, 1, \dots, T - 1$  do
4:   for  $i = 1, 2, \dots, N$  do
5:     Local Update:
6:     for  $q = 0, 1, \dots, Q - 1$  do
7:       Draw mini-batch samples  $\mathcal{B}_{t,q}^i = \{\xi_j^i\}_{j=1}^b$  with  $|\mathcal{B}_{t,q}^i| = b$  from  $D_i$  locally
8:        $x_{t,q+1}^i = x_{t,q}^i - \hat{c} \nabla_x f_i(x_{t,q}^i, y_{t,q}^i; \mathcal{B}_{t,q}^i)$ 
9:        $y_{t,q+1}^i = y_{t,q}^i + c \nabla_y f_i(\bar{x}_k, y_{t,q}^i; \mathcal{B}_{t,q}^i)$ 
10:    end for
11:  end for
12:   $x_{t+1,0}^i = \bar{x}_{t+1} = \bar{x}_t + \eta_x \frac{1}{N} \sum_{i=1}^N (x_{t,Q}^i - \bar{x}_t)$ 
13:   $y_{t+1,0}^i = \bar{y}_{t+1} = \bar{y}_t + \eta_y \frac{1}{N} \sum_{i=1}^N (y_{t,Q}^i - \bar{y}_t)$ 
14:  if  $\text{mod}(t + 1, S) = 0$  then
15:     $k = k + 1$ 
16:     $\tilde{x}_k = \bar{x}_{t+1}$ 
17:  end if
18: end for
19: Output:  $x$  and  $y$  chosen uniformly random from  $\{(\bar{x}_t, \bar{y}_t)\}_{t=1}^T$ .
```

---

(ii) Variance Bound. The following inequalities hold for all  $\xi^{(i)} \sim \mathcal{D}_i, i, j \in [N]$ :

$$\begin{aligned} \mathbb{E} \|\nabla f_i(x, y; \xi^{(i)}) - \nabla f_i(x, y)\|^2 &\leq \sigma^2 \\ \frac{1}{N} \sum_{i=1}^N \|\nabla f_i(x, y) - \nabla F(x, y)\|^2 &\leq \zeta^2 \end{aligned} \quad (2)$$

The Assumption 3.1 is a standard assumption in stochastic optimization, which will be used throughout the rest of the paper. In FL algorithms, the Assumption 3.1 (ii) is frequently used to bound the variance and data heterogeneity. The heterogeneity parameter,  $\zeta$ , denotes the level of data heterogeneity. In the homogeneous data configuration,  $\zeta = 0$ .

### 3.1 Nonconvex Concave (NC-C) Problems

**Assumption 3.2.** (Concavity). The nonconvex function  $f(\cdot, \cdot)$  is concave in  $y$  if for a fixed  $x \in \mathbb{R}^{d_1}, \forall y, y' \in \mathbb{R}^{d_2}$ , we have

$$f(x, y) \leq f(x, y') + \langle \nabla f(x, y'), y - y' \rangle \quad (3)$$

To solve the problem (1) under the NC-C setting and reduce the complexity, we propose FedSGDA+ (Seen in algorithm 1). Although local SGDA+ [50] achieves the same sample complexity as the single-machine method (SGDA), its communication complexity is not optimal. This unsatisfactory result is due to the fact that local SGDA+ simply extends the single-machine method into the distributed setting, and does not consider the complicated local-server structure in FL.

In FedSGDA+, Line 5-10 are conducted in the local clients. The updates of variable  $x$  are similar to the standard stochastic algorithm for minimization problems, such as FedAvg. We sample data points and update the  $x$  locally with the current variable  $x_{t,q}^i$  and  $y_{t,q}^i$ . However, for the  $y$ -updates, stochastic gradients are calculated with the latest snapshot of  $x$  (i.e.,  $\bar{x}_k$ ) and in each local iteration,  $y$  updates with the constant  $\bar{x}_k$  as seen in Line 9 in Algorithm 1. The  $\bar{x}_k$  is updated every  $S$  rounds (Line 14-16 in Algorithm 1).

In addition, we make use of the advantage of FL and introduce the global step size  $\eta_x, \eta_y$ , which provides the flexibility of FL training (Seen in Line 12-13). Local SGDA+ could be regarded as a special case of FedSGDA+. We now provide the convergence analysis of FedSGDA+ and introduce the necessary assumptions. The details of the proofs are provided in the supplementary materials.

**Assumption 3.3.** (Smoothness). Each local function  $f_i(x, y)$  has a  $L_f$ -Lipschitz continuous gradients, i.e.,  $\forall x_1, x_2$  and  $y_1, y_2$ , we have

$$\|\nabla f_i(x_1, y_1) - \nabla f_i(x_2, y_2)\| \leq L_f \|(x_1, y_1) - (x_2, y_2)\| \quad (4)$$

The Assumption 3.3 on the smoothness is a standard assumption in stochastic optimization [2, 17].

**Assumption 3.4.** (Lipschitz continuity in x). For the function  $F$ , there exists a constant  $G_x$ , such that for each  $y \in \mathbb{R}^{d_2}$ , and  $\forall x, x' \in \mathbb{R}^{d_1}$ , we have

$$\|F(x, y) - F(x', y)\| \leq G_x \|x - x'\|$$

Under the NC-C setting, the function  $F(\cdot, \cdot)$  is concave in  $y$ . Following [9], we define  $\Phi(x) = \max_y F(x, y)$  and the Moreau envelope of  $\Phi(\cdot)$  is defined below:

**Definition 3.5.** (Moreau Envelope) A function  $\Phi_\lambda(\cdot)$  is the  $\lambda$ -Moreau envelope of  $\Phi(\cdot)$ , for  $\lambda > 0$ , if  $\forall x \in \mathbb{R}^{d_1}$ ,

$$\Phi_\lambda(x) = \min_z \Phi(z) + \frac{1}{2\lambda} \|z - x\|^2$$

From [38], we know that when we have a point  $x$  that is an  $\varepsilon$ -stationary point of  $\Phi_\lambda(x)$ , then  $x$  is close to a point  $x'$  which is stationary for  $\Phi(x)$ . Hence, we focus on minimizing  $\|\nabla \Phi_\lambda(x)\|$  under the NC-C setting.

**Theorem 3.6.** Suppose Assumptions 3.1, 3.2, 3.3, 3.4 hold and the sequences  $\{x_t, y_t\}$  are generated by Algorithm 1,  $\max\{c\eta_y, c\} \leq \frac{1}{10QL_f}$  and let  $\|\bar{y}_t\|^2 \leq D$  following [10, 50],

$$\begin{aligned} & \frac{1}{T} \sum_{t=0}^{T-1} \mathbb{E} \|\nabla \Phi_{1/2L_f}(\bar{x}_t)\|^2 \leq 8L_f \hat{c}\eta_x (QG_x^2 + \frac{\sigma^2}{N}) + 8 \frac{\mathbb{E}[\Phi_{1/2L_f}(x_0)] - \mathbb{E}[\Phi_{1/2L_f}(\bar{x}_T)]}{Q\hat{c}\eta_x T} \\ & + 48L_f^2 Q[\hat{c}^2 + c^2](\sigma^2 + 6Q\zeta^2) + 288L_f^2 Q^2 \hat{c}^2 G_x^2 \\ & + 576L_f^3 Q^2 c^2 [\frac{D}{c\eta_y Q S} + \frac{c\eta_y \sigma^2}{N} + 6L_f Q^2 c^2 (\sigma^2 + 6\zeta^2)] \\ & + 32L_f G_x \eta_x \hat{c} S Q \sqrt{G_x^2 + \frac{\sigma^2}{N}} + \frac{16L_f D}{c\eta_y Q S} + \frac{16L_f (c\eta_y) \sigma^2}{N} + 96L_f^2 Q^2 c^2 (\sigma^2 + 6\zeta^2) \end{aligned}$$

**Corollary 3.7.** By setting  $c = \hat{c} = \frac{1}{10L_f Q T^{1/3}}$ ,  $Q = \frac{T^{1/3}}{N}$ ,  $\hat{c}\eta_x = \frac{N}{10L_f T}$ ,  $c\eta_y = \frac{1}{10L_f Q} = \frac{N}{10L_f T^{1/3}}$ ,  $S = T^{1/3}$ , FedSGDA+ has the following convergence rate:

$$\begin{aligned} & \frac{1}{T} \sum_{t=0}^{T-1} \mathbb{E} \|\nabla \Phi_{1/2L_f}(\bar{x}_t)\|^2 \leq \frac{80L_f \Delta}{T^{1/3}} + \frac{4(G_x^2 + \sigma^2)}{5T^{2/3}} + \frac{24(\sigma^2 + 6\zeta^2)}{25T^{2/3}} + \frac{72G_x^2}{25T^{2/3}} + \frac{24(\sigma^2 + 6\zeta^2)}{25T^{2/3}} \\ & + \frac{144L_f}{25T^{2/3}} [\frac{10L_f D}{T^{1/3}} + \frac{\sigma^2}{10L_f T^{1/3}} + \frac{3(\sigma^2 + 6\zeta^2)}{50L_f T^{2/3}}] + \frac{16G_x}{5T^{1/3}} \sqrt{G_x^2 + \frac{\sigma^2}{N}} + \frac{160L_f^2 D}{T^{1/3}} + \frac{8\sigma^2}{5T^{1/3}} \end{aligned}$$

**Remark 3.8.** (Complexity) Based on Corollary 3.7, to make  $\frac{1}{T} \sum_{t=0}^{T-1} \mathbb{E} \|\nabla \Phi_{1/2L_f}(\bar{x}_t)\|^2 \leq \varepsilon^2$ , communication complexity  $T = O(\varepsilon^{-6})$ . We choose  $b = O(1)$ , then we have sample complexity  $bQT = N^{-1}\varepsilon^{-8}$ . It also denotes that FedSGDA+ has linear speedup with respect to the number of clients.

### 3.2 Nonconvex-PL (NC-PL) Problems

**Assumption 3.9.** (Polyak Łojasiewicz (PL) Condition in  $y$ ). The function  $F(x, y)$  is  $\mu$ -PL condition in  $y$  ( $\mu > 0$ ), if  $\forall x$ : 1)  $y^*(x) = \arg \max_y F(x, y)$  has a nonempty solution set; 2)  $\|\nabla_y F(x, y)\|^2 \geq 2\mu(F(x, y^*(x)) - F(x, y))$ ,  $\forall y$ .

To solve problem (1) with better convergence complexity under nonconvex-PL, we propose federated stochastic gradient ascent (FedSGDA-M) algorithm with the momentum-based variance reduction technique (Seen in in algorithm 2).

---

**Algorithm 2** FedSGDA-M Algorithm

---

- 1: **Input:**  $T$ , step sizes  $\hat{c}, c, \eta$ ; momentum coefficient  $\alpha, \beta$ , the number of local updates  $Q$ , and mini-batch size  $b$  and initial mini-batch size  $B$ ;
  - 2: **Initialize:**  $x_0^i = \bar{x}_0 = \frac{1}{N} \sum_{i=1}^N x_0^i, y_0^i = \bar{y}_0 = \frac{1}{N} \sum_{i=1}^N y_0^i, u_1^i = \nabla_x f(x_0^i, y_0^i; \mathcal{B}_0^i)$  and  $v_1^i = \nabla_y f(x_0^i, y_0^i; \mathcal{B}_0^i)$  where  $|\mathcal{B}_0^i| = B$  are drawn from  $D_i$  for  $i \in [N]$ .
  - 3: **for**  $t = 1, 2, \dots, T$  **do**
  - 4:   **for**  $i = 1, 2, \dots, N$  **do**
  - 5:     **if**  $\text{mod}(t, Q) = 0$  **then**
  - 6:       **Server Update:**
  - 7:        $u_t^i = \bar{u}_t = \frac{1}{N} \sum_{j=1}^N u_t^j$
  - 8:        $v_t^i = \bar{v}_t = \frac{1}{N} \sum_{j=1}^N v_t^j$
  - 9:        $x_t^i = \bar{x}_t = \frac{1}{N} \sum_{j=1}^N (x_{t-1}^j - \hat{c}\eta u_t^j)$
  - 10:        $y_t^i = \bar{y}_t = \frac{1}{N} \sum_{j=1}^N (y_{t-1}^j + c\eta v_t^j)$
  - 11:     **else**
  - 12:        $x_t^i = x_{t-1}^i - \hat{c}\eta u_t^i$
  - 13:        $y_t^i = y_{t-1}^i + c\eta v_t^i$
  - 14:     **end if**
  - 15:     Draw mini-batch samples  $\mathcal{B}_t^i = \{\xi_i^j\}_{j=1}^b$  with  $|\mathcal{B}_t^i| = b$  from  $D_i$  locally
  - 16:      $u_{t+1}^i = \nabla_x f_i(x_t^i, y_t^i; \mathcal{B}_t^i) + (1 - \alpha)(u_t^i - \nabla_x f_i(x_{t-1}^i, y_{t-1}^i; \mathcal{B}_t^i))$
  - 17:      $v_{t+1}^i = \nabla_y f_i(x_t^i, y_t^i; \mathcal{B}_t^i) + (1 - \beta)(v_t^i - \nabla_y f_i(x_{t-1}^i, y_{t-1}^i; \mathcal{B}_t^i))$
  - 18:     **end for**
  - 19: **end for**
  - 20: **Output:**  $x$  and  $y$  chosen uniformly random from  $\{\bar{x}_t, \bar{y}_t\}_{t=1}^T$ .
- 

In FedSGDA-M, each client initializes the gradient estimators  $\{u_1^i, v_1^i\}$  with stochastic gradient as seen in line 2 of Algorithm 2. Following that, each client updates the model variables  $\{x_t^i, y_t^i\}$  locally as standard stochastic gradient descent ascent method (lines 12-13 of Algorithm 2). Compared with local momentum SGDA [50], the key difference is that clients utilize variance reduction gradient estimators  $\{u_t^i, v_t^i\}$ , which are constructed in lines 15-17 of Algorithm 2. For the update step of  $\{u_t, v_t\}$ , the coefficients should satisfy  $0 < \alpha < 1$  and  $0 < \beta < 1$ . In every  $Q$  iteration, clients transmit model parameters and gradient estimators to the server, which computes  $\{\bar{x}_t, \bar{y}_t, \bar{u}_t, \bar{v}_t\}$ . Then the server sends averaged model variables and gradient estimators to each client to update the local variables, as shown in lines 5-10 of Algorithm 2.

**Definition 3.10.** According to Assumption 3.9, there exists at least one solution to the problem  $\max_y F(x, y)$  for any  $x$ . Here we define  $\Phi(x) = F(x, y^*(x)) = \max_y F(x, y)$ . We use  $\varepsilon$ -stationary point of  $\Phi(x)$ , i.e.  $\|\nabla \Phi(x)\| \leq \varepsilon$  as the convergence metric.

We know  $\Phi(x)$  is differentiable and  $(L + \kappa L)$ -smooth and  $y^*(\cdot)$  is  $\kappa$ -Lipschitz from [50]. Given that  $\nabla_y F(\bar{x}_t, y^*(x_t)) = 0$ , we have  $\nabla \Phi(\bar{x}_t) = \nabla_x F(\bar{x}_t, y^*(x_t)) + \nabla_y F(\bar{x}_t, y^*(x_t)) \cdot \partial y^*(\bar{x}_t) = \nabla_x F(\bar{x}_t, y^*(x_t))$  which is widely used in the analysis of nonconvex-PL [10] and nonconvex-strongly-concave minimax optimization [62, 38]. Then we discuss the convergence analysis of FedSGDA-M. The proofs are provided in the supplementary materials.

**Assumption 3.11.** (Lipschitz Smoothness) Each component function  $f_i(x, y; \xi)$  has a  $L_f$ -Lipschitz gradient, i.e.,  $\forall x_1, x_2$  and  $y_1, y_2$ , we have

$$\mathbb{E}\|\nabla f_i(x_1, y_1; \xi) - \nabla f_i(x_2, y_2; \xi)\| \leq L_f \|(x_1, y_1) - (x_2, y_2)\| \quad (5)$$

$F(x, y)$  has an  $L_f$ -Lipschitz gradient based on the convexity of norm and Assumption 3.11. We have

$$\begin{aligned} \|\nabla_x F(x_1, y_1) - \nabla_x F(x_2, y_2)\| &= \left\| \frac{1}{N} \sum_{i=1}^N \mathbb{E}[\nabla_x f_i(x_1, y_1; \xi) - \nabla_x f_i(x_2, y_2; \xi)] \right\| \\ &\leq \frac{1}{N} \sum_{i=1}^N \mathbb{E}\|\nabla_x f_i(x_1, y_1; \xi) - \nabla_x f_i(x_2, y_2; \xi)\| \\ &\leq L_f \|(x_1, y_1) - (x_2, y_2)\| \end{aligned}$$

In optimization analysis, it is standard to use the Assumption 3.11. Several widely used single-machine stochastic algorithms, such as SPIDER [13] and STORM [7], make use of this assumption. It is also used by numerous FL algorithms, including MIME [32] Fed-GLOMO [8], STEM [34] and FAFED [58].

**Theorem 3.12.** *Suppose that sequence  $\{\bar{x}_t, \bar{y}_t\}_{t=0}^T$  is generated from Algorithm 2. Under the above Assumptions (3.1, 3.9, 3.11), given  $\eta = \frac{1}{20QL}$ ,  $\alpha = c_1\eta^2$ ,  $\beta = c_2\eta^2$ ,  $c_1 = \frac{30L^2}{bN\kappa^{1-\nu}}$ ,  $c_2 = \frac{30L^2}{bN\kappa^{2-2\nu}}$ ,  $c = \frac{1}{6\kappa^{1-\nu}}$ ,  $\hat{c} = \frac{1}{54\kappa^{3-\nu}}$  where  $\nu \in [0, 1]$  we have*

$$\begin{aligned} \frac{1}{T} \sum_{t=0}^{T-1} \mathbb{E} \|\nabla\Phi(\bar{x}_t)\|^2 &\leq \frac{2[\Phi(\bar{x}_0) - \Phi(\bar{x}_T)]}{\hat{c}\eta T} + \frac{3\sigma^2}{\alpha TBN} + \frac{36L_f^2\sigma^2}{\mu^2\beta TBN} + \frac{12L_f^2}{c\eta\mu^2 T} [\Phi(\bar{x}_0) - F(\bar{x}_0, \bar{y}_t)] \\ &+ \frac{6\alpha\sigma^2}{Nb} + \frac{72\beta\sigma^2L_f^2}{Nb\mu^2} + \left[ \frac{\sigma^2(c_1^2 + c_2^2)}{30bL^2} + \frac{\zeta^2(c_1^2 + c_2^2)}{12L^2} \right] \kappa^2\eta^2 \end{aligned}$$

**Corollary 3.13.** *By setting  $b = O(\kappa^\nu)$  for  $\nu \in [0, 1]$ ,  $c_1 = \frac{30L^2}{bN\kappa^{1-\nu}}$ ,  $c_2 = \frac{30L^2}{bN\kappa^{2-2\nu}}$ ,  $c = \frac{1}{6\kappa^{1-\nu}}$ ,  $\hat{c} = \frac{1}{54\kappa^{3-\nu}}$ ,  $T = \kappa^{3-\nu}T_0$ ,  $Q = \frac{T_0^{1/3}}{N^{2/3}}$ ,  $\eta = \frac{1}{20QL} = \frac{N^{2/3}}{20LT_0^{1/3}}$ ,  $B = \frac{T_0^{1/3}b\kappa^{1-\nu}}{N^{2/3}}$ , we have  $\alpha = c_1\eta^2 = \frac{3N^{1/3}}{40T_0^{2/3}b\kappa^{1-\nu}}$ ,  $\beta = c_2\eta^2 = \frac{3N^{1/3}}{40T_0^{2/3}b\kappa^{2-2\nu}}$ .*

$$\begin{aligned} \frac{1}{T} \sum_{t=0}^{T-1} \mathbb{E} \|\nabla\Phi(\bar{x}_t)\|^2 &\leq \frac{2160L[\Phi(\bar{x}_0) - \Phi^*]}{(NT_0)^{2/3}} + \frac{40\sigma^2}{\kappa^{3-\nu}(NT_0)^{2/3}} + \frac{480\sigma^2}{\kappa^2(NT_0)^{2/3}} \\ &+ \frac{240L_f}{(NT_0)^{2/3}} [\Phi(\bar{x}_0) - F(\bar{x}_0, \bar{y}_0)] + \frac{9\sigma^2}{20b\kappa(NT_0)^{2/3}} + \frac{27\sigma^2}{5(NT_0)^{2/3}} + \left[ \frac{3\sigma^2}{20b} + \frac{15\zeta^2}{40} \right] \frac{1}{(NT_0)^{2/3}} \end{aligned}$$

where  $\Phi^*$  is the optimal.

**Remark 3.14.** (Complexity) To make the  $\frac{1}{T} \sum_{t=0}^{T-1} \mathbb{E} \|\nabla\Phi(\bar{x}_t)\|^2 \leq \varepsilon^2$ , we get  $T_0 = O(N^{-1}\varepsilon^{-3})$  and  $T = O(\kappa^{3-\nu}N^{-1}\varepsilon^{-3})$ . Considering the  $b = \kappa^\nu$ , we have communication complexity  $\frac{T}{Q} = \kappa^{3-\nu}(NT_0)^{2/3} = \kappa^{3-\nu}\varepsilon^{-2}$  and sample complexity  $bT = O(\kappa^3N^{-1}\varepsilon^{-3})$ . When  $\nu = 1$ ,  $b = \kappa$ , communication Complexity  $\frac{T}{Q} = \kappa^2\varepsilon^{-2}$  for finding an  $\varepsilon$ -stationary point. Sample complexity  $bT = O(\kappa^3N^{-1}\varepsilon^{-3})$  matches the complexity result achieved by the single-machine algorithms, such as SREDA and Acc-MDA in [42, 29] but we do not require a large batch size  $b$  compared with these algorithms. And  $O(\kappa^3N^{-1}\varepsilon^{-3})$  also exhibits a linear speed-up compared with the aforementioned single-machine algorithms.

### 3.3 Nonconvex-Strongly-Concave (NC-SC) Problems

**Assumption 3.15.** Each local function  $f_i(x, y)$  is  $\mu$ -strongly concave in  $y \in \mathcal{Y}$ , i.e.,  $\forall x \in \mathcal{X}$  and  $y_1, y_2 \in \mathcal{Y}$ , we have

$$\|\nabla_y f_i(x, y_1) - \nabla_y f_i(x, y_2)\| \geq \mu\|y_1 - y_2\|$$

When the function  $F(x, y)$  is strongly concave in  $y \in \mathcal{Y}$ , there exists a unique solution to the problem  $\max_{y \in \mathcal{Y}} f(x, y)$  for any  $x$ . Since PL condition is weaker than strong concavity, the convergence result of FedSGDA-M in Algorithm 2 under NC-PL also apply to NC-SC problem and FedSGDA-M has the sample complexity of  $O(\kappa^3n^{-1}\varepsilon^{-3})$  and the communication complexity of  $O(\kappa^2\varepsilon^{-2})$  under nonconvex-strongly-concave setting.

## 4 Experiments

We conduct experiments on AUROC maximization and fair classification tasks to verify the efficiency of our algorithms under nonconvex-strongly-concave and nonconvex-concave settings. Experiments are completed on the computer cluster with AMD EPYC 7513 Processors and NVIDIA RTX A6000. The code is available \*

\* <https://github.com/xidongwu/Federated-Minimax-and-Conditional-Stochastic-Optimization>



**Datasets and Models:** We test the performance of algorithms on three typical datasets: Fashion-MNIST dataset, CIFAR-10 dataset and Tiny-ImageNet. Fashion-MNIST dataset has 70,000  $28 \times 28$  gray images (10 categories, 60,000 training images and 10,000 testing images). CIFAR-10 dataset consists of 50,000 training images and 10,000 testing images. Each image is the  $3 \times 32 \times 32$  arrays of color image. Tiny-ImageNet dataset has 200 classes of ( $64 \times 64$ ) colored images and each class has 500 training images, 50 validation images, and 50 test images. For Fashion MNIST and Cifar10 data sets, we choose convolutional neural network from [28] (The details are shown in the supplementary materials). For Tiny-ImageNet, we choose ResNet-18 [24] as the model.

#### 4.1 Fair Classification

First, we follow [50, 28] and train fair classification networks by minimizing the maximum loss over different categories.

$$\min_x \max_{y \in \mathcal{Y}} \frac{1}{N} \sum_{i=1}^N \sum_{c=1}^C y_c \mathcal{L}_c^i(x) \quad \text{s.t. } \mathcal{Y} = \{y \mid y_i \geq 0, \sum_{i=1}^C y_i = 1\}$$

where  $\mathcal{L}_c^i$  denotes the cross-entropy loss functions corresponding to the class  $c$  in  $C$  different classes and  $x$  denotes the CNN model parameters. Clearly, the problem in (6) is nonConvex in  $x$  (deep model parameters), and Concave in  $y$ . We compare our algorithm (FedSGDA+) and local SGDA+ with varying model, datasets, local update numbers, step size. Although the constraint is not considered in the theoretical analysis of local SGDA+ and FedSGDA+, FedSGDA+ still shows better performance compared with local SGDA+.

The network has 20 clients. The datasets are partitioned into disjoint sets across all clients and each client holds part of the data from all the classes [34]. We initialize the resnet18 with pre-trained weights in PyTorch. In experiments, we run grid search for step size, and choose the step size for primal variable in the set  $\{0.01, 0.03, 0.05, 0.1, 0.3\}$  and that for dual variable in the set  $\{0.001, 0.01, 0.1\}$ . We choose the global step size in the set  $\{0.1, 0.5, 1, 1.5, 2\}$ . The batch-size  $b$  is in 50 and the inner loop number  $Q$  is selected from  $\{20, 50, 100\}$ . The outer loop number  $S$  is selected from  $\{1, 5, 10\}$  for FedSGDA+ and  $\{1, 5, 10, Q\}$  for local SGDA+.

Figure 1 shows that FedSGDA+ has a better convergence rate than local SGDA+. This confirms that our algorithm can effectively accelerate SGDA by using the structure of federated learning. Due to the page limitation, the ablation analysis of step size is presented in the supplementary materials.

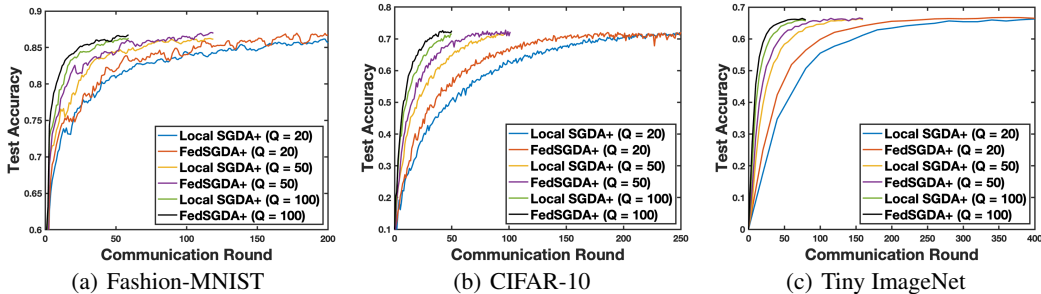

Figure 1: Test Accuracy vs the number of communication rounds during the training phase.

#### 4.2 AUROC Maximization

[39] showed the AUROC maximization problem could be reformulated as the non-convex-strongly-concave minimax optimization, as below:

$$\min_{\substack{\mathbf{m} \in \mathbb{R}^d \\ (a,b) \in \mathbb{R}^2}} \max_{w \in \mathbb{R}} \frac{1}{N} \sum_{i=1}^N \mathbb{E}_{\xi_i \sim \mathcal{D}_i} [f_i(\mathbf{m}, a, b, w; \xi)] \quad (6)$$

where

$$f(\mathbf{m}, a, b, w; \xi) = (1-p)(h(\mathbf{m}; \mathbf{x}) - a)^2 \mathbb{I}_{[y=1]} + p(h(\mathbf{m}; \mathbf{x}) - b)^2 \mathbb{I}_{[y=-1]} \\ + 2(1+w)[ph(\mathbf{m}; \mathbf{x}) \mathbb{I}_{[y=-1]} - (1-p)h(\mathbf{m}; \mathbf{x}) \mathbb{I}_{[y=1]}] - p(1-p)w^2$$

$\xi_i = (\mathbf{x}, y) \sim \mathcal{D}_i$  denotes a random data point and  $\mathbf{x}$  represents the data features and  $y \in \mathcal{Y} = \{-1, +1\}$  is the label.  $h(\mathbf{m}; \mathbf{x})$  denotes the prediction score of the data point  $\mathbf{x}$  calculated by a model with parameter  $\mathbf{m}$ .  $p = Pr(y = 1) = \mathbb{E}_y[\mathbb{I}_{[y=1]}]$  denotes the prior probability of the positive data.

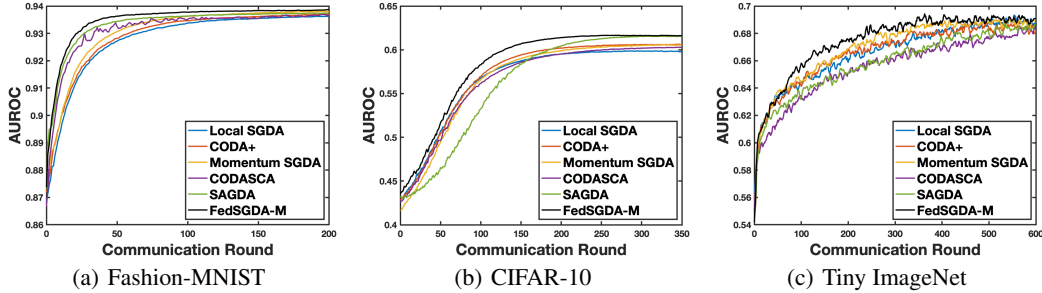

Figure 2: AUROC scores on the test datasets vs the number of communication rounds during the training phase.

Following [19, 67], we constructed the imbalanced binary-class versions of datasets as follow: firstly, the first half of the classes (0 - 4) in the original Fashion-MNIST, CIFAR10 and classes (0 - 99) in Tiny-ImageNet datasets are converted into the negative class, and the rest half of classes are considered to be a positive class. 80% of the negative data points are randomly dropped in each dataset. Then the datasets are evenly divided into disjoint sets across 16 clients. In this case, each clients share completely different imbalanced datasets. In the experiment, we use xavier normal initialization to deep models.

We compare our algorithm (i.e., FedSGDA-M) with local SGDA [10, 50], CODA+ [19, 67], Momentum SGDA [50], CODASCA [67] and SAGDA [63] as baselines in AUROC maximization. In experiments, we carefully tune hyperparameters for all methods. We run a grid search for step size, and choose the step size for the primal variable in the set  $\{0.001, 0.005, 0.01\}$  and that for dual variable in the set  $\{0.0001, 0.001, 0.01\}$ . We choose the global step size from  $\{0.9, 1, 1.5, 2\}$  for CODASCA and SAGDA. We choose the momentum parameter in Local Momentum SGDA in the set  $\{0.1, 0.5, 0.9\}$ . The  $\alpha$  and  $\beta$  in FedSGDA-M are chosen from  $\{0.1, 0.5, 0.9\}$ . The batch-size  $b$  is 50 and the inner loop number  $Q \in \{10, 20, 50\}$ .

As shown in Figure 2, we compare the performance of FedSGDA-M and other baseline methods against the number of communication rounds. Figure 2 shows that our algorithms consistently outperform the other baseline algorithms on testing datasets, which validates the efficacy of our algorithms. Due to space limitation, other test results are provided in the supplementary materials.

**Limitation.** Minimax optimization has many applications and a more comprehensive discussion of our proposed algorithms on these tasks will be a future study because the theoretical analysis is the main contribution of this paper.

## 5 Conclusion

In this paper, we study a class of federated nonconvex minimax optimization problems (1). We consider the three most common settings (NC-SC, NC-PL, NC-C). Under the NC-C setting, we propose FedSGDA+ and prove it has the best communication complexity of  $O(\varepsilon^{-6})$ . It also achieves a linear speedup to the number of clients. Under NC-PL and NC-PL settings, we propose FedSGDA-M with variance reduction technique and we prove that our algorithm (FedSGDA-M) has the best sample complexity ( $O(\kappa^3 n^{-1} \varepsilon^{-3})$ ) and the best sample communication complexity ( $O(\kappa^2 \varepsilon^{-2})$ ). We prove that FedSGDA also enjoys linear speedup with respect to the number of clients. Therefore, we reduce the existing complexity results for the most common nonconvex minimax optimization problems under the federated learning setting.

## References

- [1] Zeyuan Allen-Zhu, Yuanzhi Li, and Zhao Song. A convergence theory for deep learning via over-parameterization. In *International Conference on Machine Learning*, pages 242–252. PMLR, 2019.
- [2] Runxue Bao, Bin Gu, and Heng Huang. An accelerated doubly stochastic gradient method with faster explicit model identification. In *Proceedings of the 31st ACM International Conference on Information & Knowledge Management*, pages 57–66, 2022.
- [3] Runxue Bao, Xidong Wu, Wenhan Xian, and Heng Huang. Doubly sparse asynchronous learning for stochastic composite optimization. In *Proceedings of the Thirty-First International Joint Conference on Artificial Intelligence, IJCAI*, pages 1916–1922, 2022.
- [4] Aleksandr Beznosikov, Pavel Dvurechensky, Anastasia Koloskova, Valentin Samokhin, Sebastian U Stich, and Alexander Gasnikov. Decentralized local stochastic extra-gradient for variational inequalities. *arXiv preprint arXiv:2106.08315*, 2021.
- [5] Zachary Charles and Dimitris Papailiopoulos. Stability and generalization of learning algorithms that converge to global optima. In *International Conference on Machine Learning*, pages 745–754. PMLR, 2018.
- [6] Lesi Chen, Boyuan Yao, and Luo Luo. Faster stochastic algorithms for minimax optimization under polyak- $\{L\}$  ojasiewicz condition. *Advances in Neural Information Processing Systems*, 35:13921–13932, 2022.
- [7] Ashok Cutkosky and Francesco Orabona. Momentum-based variance reduction in non-convex sgd. *Advances in neural information processing systems*, 32, 2019.
- [8] Rudrajit Das, Abolfazl Hashemi, Sujay Sanghavi, and Inderjit S Dhillon. Improved convergence rates for non-convex federated learning with compression. *arXiv e-prints*, pages arXiv–2012, 2020.
- [9] Damek Davis and Dmitriy Drusvyatskiy. Stochastic model-based minimization of weakly convex functions. *SIAM Journal on Optimization*, 29(1):207–239, 2019.
- [10] Yuyang Deng and Mehrdad Mahdavi. Local stochastic gradient descent ascent: Convergence analysis and communication efficiency. In *International Conference on Artificial Intelligence and Statistics*, pages 1387–1395. PMLR, 2021.
- [11] Yuyang Deng, Mohammad Mahdi Kamani, and Mehrdad Mahdavi. Distributionally robust federated averaging. *arXiv preprint arXiv:2102.12660*, 2021.
- [12] Jelena Diakonikolas, Constantinos Daskalakis, and Michael I Jordan. Efficient methods for structured nonconvex-nonconcave min-max optimization. In *International Conference on Artificial Intelligence and Statistics*, pages 2746–2754. PMLR, 2021.
- [13] Cong Fang, Chris Junchi Li, Zhouchen Lin, and Tong Zhang. Spider: Near-optimal non-convex optimization via stochastic path-integrated differential estimator. *Advances in Neural Information Processing Systems*, 31, 2018.
- [14] Tanner Fiez, Lillian Ratliff, Eric Mazumdar, Evan Faulkner, and Adhyyan Narang. Global convergence to local minmax equilibrium in classes of nonconvex zero-sum games. *Advances in Neural Information Processing Systems*, 34:29049–29063, 2021.
- [15] Hongchang Gao, Junyi Li, and Heng Huang. On the convergence of local stochastic compositional gradient descent with momentum. In *International Conference on Machine Learning*, pages 7017–7035. PMLR, 2022.
- [16] Ian Goodfellow, Jean Pouget-Abadie, Mehdi Mirza, Bing Xu, David Warde-Farley, Sherjil Ozair, Aaron Courville, and Yoshua Bengio. Generative adversarial nets. In *Advances in neural information processing systems*, pages 2672–2680, 2014.
- [17] Bin Gu, Runxue Bao, Chenkang Zhang, and Heng Huang. New scalable and efficient online pairwise learning algorithm. *IEEE Transactions on Neural Networks and Learning Systems*, 2023.
- [18] Ishaan Gulrajani, Faruk Ahmed, Martin Arjovsky, Vincent Dumoulin, and Aaron C Courville. Improved training of wasserstein gans. *Advances in neural information processing systems*, 30, 2017.
- [19] Zhishuai Guo, Mingrui Liu, Zhuoning Yuan, Li Shen, Wei Liu, and Tianbao Yang. Communication-efficient distributed stochastic auc maximization with deep neural networks. In *International Conference on Machine Learning*, pages 3864–3874. PMLR, 2020.

- [20] Zhishuai Guo, Yi Xu, Wotao Yin, Rong Jin, and Tianbao Yang. A novel convergence analysis for algorithms of the adam family and beyond. *arXiv preprint arXiv:2104.14840*, 2021.
- [21] Zhishuai Guo, Rong Jin, Jiebo Luo, and Tianbao Yang. Fedxl: Provable federated learning for deep x-risk optimization. 2023.
- [22] Songyang Han, Sanbao Su, Sihong He, Shuo Han, Haizhao Yang, and Fei Miao. What is the solution for state adversarial multi-agent reinforcement learning? *arXiv preprint arXiv:2212.02705*, 2022.
- [23] Huan He, Shifan Zhao, Yuanzhe Xi, Joyce Ho, and Yousef Saad. Gda-am: On the effectiveness of solving min-imax optimization via anderson mixing. In *International Conference on Learning Representations*, 2021.
- [24] Kaiming He, Xiangyu Zhang, Shaoqing Ren, and Jian Sun. Deep residual learning for image recognition. In *Proceedings of the IEEE conference on computer vision and pattern recognition*, pages 770–778, 2016.
- [25] Sihong He, Songyang Han, Sanbao Su, Shuo Han, Shaofeng Zou, and Fei Miao. Robust multi-agent reinforcement learning with state uncertainty. *Transactions on Machine Learning Research*, 2023. ISSN 2835-8856. URL <https://openreview.net/forum?id=CqTkapZ6H9>.
- [26] Charlie Hou, Kiran K Thekumparampil, Giulia Fanti, and Sewoong Oh. Efficient algorithms for federated saddle point optimization. *arXiv preprint arXiv:2102.06333*, 2021.
- [27] Feihu Huang and Songcan Chen. Near-optimal decentralized momentum method for nonconvex-pl minimax problems. *arXiv preprint arXiv:2304.10902*, 2023.
- [28] Feihu Huang, Xidong Wu, and Heng Huang. Efficient mirror descent ascent methods for nonsmooth minimax problems. *Advances in Neural Information Processing Systems*, 34:10431–10443, 2021.
- [29] Feihu Huang, Shangqian Gao, Jian Pei, and Heng Huang. Accelerated zeroth-order and first-order momentum methods from mini to minimax optimization. *J. Mach. Learn. Res.*, 23:36–1, 2022.
- [30] Feihu Huang, Xidong Wu, and Zhengmian Hu. Adagda: Faster adaptive gradient descent ascent methods for minimax optimization. In *International Conference on Artificial Intelligence and Statistics*, pages 2365–2389. PMLR, 2023.
- [31] Chi Jin, Praneeth Netrapalli, and Michael I Jordan. Minmax optimization: Stable limit points of gradient descent ascent are locally optimal. *arXiv preprint arXiv:1902.00618*, 2019.
- [32] Sai Praneeth Karimireddy, Martin Jaggi, Satyen Kale, Mehryar Mohri, Sashank J Reddi, Sebastian U Stich, and Ananda Theertha Suresh. Mime: Mimicking centralized stochastic algorithms in federated learning. *arXiv preprint arXiv:2008.03606*, 2020.
- [33] Sai Praneeth Karimireddy, Satyen Kale, Mehryar Mohri, Sashank Reddi, Sebastian Stich, and Ananda Theertha Suresh. Scaffold: Stochastic controlled averaging for federated learning. In *International conference on machine learning*, pages 5132–5143. PMLR, 2020.
- [34] Prashant Khanduri, Pranay Sharma, Haibo Yang, Mingyi Hong, Jia Liu, Ketan Rajawat, and Pramod Varshney. Stem: A stochastic two-sided momentum algorithm achieving near-optimal sample and communication complexities for federated learning. *Advances in Neural Information Processing Systems*, 34, 2021.
- [35] Weiwei Kong and Renato DC Monteiro. An accelerated inexact proximal point method for solving nonconvex-concave min-max problems. *SIAM Journal on Optimization*, 31(4):2558–2585, 2021.
- [36] Tian Li, Anit Kumar Sahu, Manzil Zaheer, Maziar Sanjabi, Ameet Talwalkar, and Virginia Smith. Federated optimization in heterogeneous networks. *Proceedings of Machine learning and systems*, 2:429–450, 2020.
- [37] Luofeng Liao, Li Shen, Jia Duan, Mladen Kolar, and Dacheng Tao. Local adagrad-type algorithm for stochastic convex-concave minimax problems. *arXiv preprint arXiv:2106.10022*, 2021.
- [38] Tianyi Lin, Chi Jin, and Michael Jordan. On gradient descent ascent for nonconvex-concave minimax problems. In *International Conference on Machine Learning*, pages 6083–6093. PMLR, 2020.
- [39] Mingrui Liu, Zhuoning Yuan, Yiming Ying, and Tianbao Yang. Stochastic auc maximization with deep neural networks. *arXiv preprint arXiv:1908.10831*, 2019.
- [40] Mingrui Liu, Wei Zhang, Youssef Mroueh, Xiaodong Cui, Jarret Ross, Tianbao Yang, and Payel Das. A decentralized parallel algorithm for training generative adversarial nets. *Advances in Neural Information Processing Systems*, 33:11056–11070, 2020.

- [41] Zhuqing Liu, Xin Zhang, Songtao Lu, and Jia Liu. Precision: Decentralized constrained min-max learning with low communication and sample complexities. *arXiv preprint arXiv:2303.02532*, 2023.
- [42] Luo Luo, Haishan Ye, Zhichao Huang, and Tong Zhang. Stochastic recursive gradient descent ascent for stochastic nonconvex-strongly-concave minimax problems. *Advances in Neural Information Processing Systems*, 33:20566–20577, 2020.
- [43] Pouria Mahdavinia, Yuyang Deng, Haochuan Li, and Mehrdad Mahdavi. Tight analysis of extra-gradient and optimistic gradient methods for nonconvex minimax problems. *Advances in Neural Information Processing Systems*, 35:31213–31225, 2022.
- [44] Brendan McMahan, Eider Moore, Daniel Ramage, Seth Hampson, and Blaise Aguera y Arcas. Communication-efficient learning of deep networks from decentralized data. In *Artificial intelligence and statistics*, pages 1273–1282. PMLR, 2017.
- [45] Maher Nouiehed, Maziar Sanjabi, Tianjian Huang, Jason D Lee, and Meisam Razaviyayn. Solving a class of non-convex min-max games using iterative first order methods. *Advances in Neural Information Processing Systems*, 32, 2019.
- [46] H Rafique, M Liu, Q Lin, and T Yang. Non-convex min-max optimization: provable algorithms and applications in machine learning. *arXiv preprint arXiv:1810.02060*, 2018.
- [47] Mohammad Rasouli, Tao Sun, and Ram Rajagopal. Fedgan: Federated generative adversarial networks for distributed data. *arXiv preprint arXiv:2006.07228*, 2020.
- [48] Sashank Reddi, Zachary Charles, Manzil Zaheer, Zachary Garrett, Keith Rush, Jakub Konečný, Sanjiv Kumar, and H Brendan McMahan. Adaptive federated optimization. *arXiv preprint arXiv:2003.00295*, 2020.
- [49] Amirhossein Reisizadeh, Farzan Farnia, Ramtin Pedarsani, and Ali Jadbabaie. Robust federated learning: The case of affine distribution shifts. *Advances in Neural Information Processing Systems*, 33:21554–21565, 2020.
- [50] Pranay Sharma, Rohan Panda, Gauri Joshi, and Pramod Varshney. Federated minimax optimization: Improved convergence analyses and algorithms. In *International Conference on Machine Learning*, pages 19683–19730. PMLR, 2022.
- [51] Pranay Sharma, Rohan Panda, and Gauri Joshi. Federated minimax optimization with client heterogeneity. *arXiv preprint arXiv:2302.04249*, 2023.
- [52] Zhenyu Sun and Ermin Wei. A communication-efficient algorithm with linear convergence for federated minimax learning. *arXiv preprint arXiv:2206.01132*, 2022.
- [53] Davoud Ataee Tarzanagh, Mingchen Li, Christos Thrampoulidis, and Samet Oymak. Fednest: Federated bilevel, minimax, and compositional optimization. In *International Conference on Machine Learning*, pages 21146–21179. PMLR, 2022.
- [54] Kiran K Thekumparampil, Prateek Jain, Praneeth Netrapalli, and Sewoong Oh. Efficient algorithms for smooth minimax optimization. *Advances in Neural Information Processing Systems*, 32, 2019.
- [55] Hoi-To Wai, Mingyi Hong, Zhuoran Yang, Zhaoran Wang, and Kexin Tang. Variance reduced policy evaluation with smooth function approximation. *Advances in Neural Information Processing Systems*, 32: 5784–5795, 2019.
- [56] Jingkan Wang, Tianyun Zhang, Sijia Liu, Pin-Yu Chen, Jiachen Xu, Makan Fardad, and Bo Li. Adversarial attack generation empowered by min-max optimization. *Advances in Neural Information Processing Systems*, 34:16020–16033, 2021.
- [57] Xidong Wu, Zhengmian Hu, and Heng Huang. Decentralized riemannian algorithm for nonconvex minimax problems. *arXiv preprint arXiv:2302.03825*, 2023.
- [58] Xidong Wu, Feihu Huang, Zhengmian Hu, and Heng Huang. Faster adaptive federated learning. In *Proceedings of the AAAI Conference on Artificial Intelligence*, volume 37, pages 10379–10387, 2023.
- [59] Xidong Wu, Jianhui Sun, Zhengmian Hu, Junyi Li, Aidong Zhang, and Heng Huang. Federated conditional stochastic optimization. *Advances in Neural Information Processing Systems (NeurIPS)*, 36, 2023.
- [60] Yihan Wu, Hongyang Zhang, and Heng Huang. Retrievalguard: Provably robust l-nearest neighbor image retrieval. In *International Conference on Machine Learning*, pages 24266–24279. PMLR, 2022.

- [61] Yihan Wu, Aleksandar Bojchevski, and Heng Huang. Adversarial weight perturbation improves generalization in graph neural networks. In *Proceedings of the AAAI Conference on Artificial Intelligence*, volume 37, pages 10417–10425, 2023.
- [62] Wenhan Xian, Feihu Huang, Yanfu Zhang, and Heng Huang. A faster decentralized algorithm for nonconvex minimax problems. *Advances in Neural Information Processing Systems*, 34:25865–25877, 2021.
- [63] Haibo Yang, Zhuqing Liu, Xin Zhang, and Jia Liu. Sagda: Achieving  $\mathcal{O}(\epsilon^{-2})$  communication complexity in federated min-max learning. *arXiv preprint arXiv:2210.00611*, 2022.
- [64] Junchi Yang, Negar Kiyavash, and Niao He. Global convergence and variance reduction for a class of nonconvex-nonconcave minimax problems. *Advances in Neural Information Processing Systems*, 33: 1153–1165, 2020.
- [65] Junchi Yang, Xiang Li, and Niao He. Nest your adaptive algorithm for parameter-agnostic nonconvex minimax optimization. *arXiv preprint arXiv:2206.00743*, 2022.
- [66] Junchi Yang, Antonio Orvieto, Aurelien Lucchi, and Niao He. Faster single-loop algorithms for minimax optimization without strong concavity. In *International Conference on Artificial Intelligence and Statistics*, pages 5485–5517. PMLR, 2022.
- [67] Zhuoning Yuan, Zhishuai Guo, Yi Xu, Yiming Ying, and Tianbao Yang. Federated deep auc maximization for heterogeneous data with a constant communication complexity. In *International Conference on Machine Learning*, pages 12219–12229. PMLR, 2021.
- [68] Xin Zhang, Zhuqing Liu, Jia Liu, Zhengyuan Zhu, and Songtao Lu. Taming communication and sample complexities in decentralized policy evaluation for cooperative multi-agent reinforcement learning. *Advances in Neural Information Processing Systems*, 34:18825–18838, 2021.
- [69] Xuan Zhang, Necdet Serhat Aybat, and Mert Gurbuzbalaban. Sapd+: An accelerated stochastic method for nonconvex-concave minimax problems. *arXiv preprint arXiv:2205.15084*, 2022.
- [70] Hu Zhengmian, Wu Xidong, and Huang Heng. Beyond lipschitz smoothness: A tighter analysis for nonconvex optimization. In *International Conference on Machine Learning (ICML)*, 2023.
- [71] Hanhan Zhou, Tian Lan, Guru Prasad Venkataramani, and Wenbo Ding. Federated learning with online adaptive heterogeneous local models. In *Workshop on Federated Learning: Recent Advances and New Challenges (in Conjunction with NeurIPS 2022)*, 2022.
- [72] Hanhan Zhou, Tian Lan, Guru Prasad Venkataramani, and Wenbo Ding. Every parameter matters: Ensuring the convergence of federated learning with dynamic heterogeneous models reduction. In *Advances in Neural Information Processing Systems*, volume 36, 2023.

## A Preliminary Results

**Lemma A.1.** [45, 10]

1) Under the above Assumptions 3.9 and 3.11, the function  $\Phi(x) = \max_y f(x, y) = f(x, y^*(x))$  and the mapping  $y^*(x) = \arg \max_y f(x, y)$  have  $L$ -Lipschitz continuous gradient and  $\kappa$ -Lipschitz continuous respectively, such as for all  $x_1, x_2 \in \mathbb{R}^{d_1}$

$$\|\nabla\Phi(x_1) - \nabla\Phi(x_2)\| \leq L\|x_1 - x_2\|, \quad \|y^*(x_1) - y^*(x_2)\| \leq \kappa\|x_1 - x_2\|, \quad (7)$$

where  $L = L_f(1 + \kappa)$  and  $\kappa = L_f/\mu$ .

2) (Quadratic growth condition) If the function  $g(x)$  satisfies Assumptions 3.9 and 3.11, then  $\forall x$ , the following conditions holds

$$g(x) - \min_z g(z) \geq \frac{\mu}{2} \|x_p - x\|^2 \quad (8)$$

$$\|\nabla g(x)\|^2 \geq 2\mu \left( g(x) - \min_z g(z) \right) \quad (9)$$

3) If  $F$  is  $L$ -smooth then

$$\|\nabla_y F(x, y)\|^2 \leq 2L_f[\Phi(x) - F(x, y)] \quad (10)$$

**Lemma A.2.** [34] For a finite sequence  $x_t^n \in \mathbb{R}^d$ ,  $n \in [N]$  and  $\bar{x}_t \in \mathbb{R}^d$ , we have

$$\sum_{n=1}^N \|x_t^n - \bar{x}_t\|^2 \leq \sum_{n=1}^N \|x_t^n\|^2 \quad (11)$$

## B Nonconvex-Concave (NS-C)

In this part, we analyze the convergence result of FedSGDA+ in Algorithm 1. We define  $\hat{x}_t = \arg \min_x \Phi(x) + L_f \|x - \bar{x}_t\|^2$ , and define  $\Phi_{1/2L_f}(\bar{x}_t) = \min_x \Phi(x) + L_f \|x - \bar{x}_t\|^2$

### B.1 Important Conclusions

**Lemma B.1.** Suppose Assumptions 3.1, 3.2, 3.3, 3.4 hold and the sequences  $\{x_t, y_t\}$  are generated by Algorithm 1, we have

$$\begin{aligned} \mathbb{E} [\Phi_{1/2L_f}(\bar{x}_{t+1})] &\leq \mathbb{E} [\Phi_{1/2L_f}(\bar{x}_t)] + QL_f(\hat{c}\eta_x)^2(QG_x^2 + \frac{\sigma^2}{N}) - \frac{Q\hat{c}\eta_x}{8} \mathbb{E} \|\nabla\Phi_{1/2L_f}(\bar{x}_t)\|^2 \\ &+ \frac{2\hat{c}\eta_x L_f^2}{N} \sum_{i=1}^N \sum_{q=0}^{Q-1} \mathbb{E}(\|x_{t,q}^i - \bar{x}_t\|^2 + \|y_{t,q}^i - \bar{y}_t\|^2) + 2Q\hat{c}\eta_x L_f \mathbb{E} [\Phi(\bar{x}_t) - F(\bar{x}_t, \bar{y}_t)] \end{aligned}$$

*Proof.* Based on the  $x$  update step in Algorithm 1, we have

$$\begin{aligned}
\mathbb{E} \|\hat{x}_t - \bar{x}_{t+1}\|^2 &= \mathbb{E} \left\| \hat{x}_t - \bar{x}_t + \frac{\hat{c}\eta_x}{N} \sum_{i=1}^N \sum_{q=0}^{Q-1} \nabla_x f_i(x_{t,q}^i, y_{t,q}^i; \mathcal{B}_{t,q}^i) \right\|^2 \\
&= \mathbb{E} \|\hat{x}_t - \bar{x}_t\|^2 + (\hat{c}\eta_x)^2 \mathbb{E} \left\| \frac{1}{N} \sum_{i=1}^N \sum_{q=0}^{Q-1} \nabla_x f_i(x_{t,q}^i, y_{t,q}^i; \mathcal{B}_{t,q}^i) \right\|^2 \\
&\quad + 2\hat{c}\eta_x \mathbb{E} \left\langle \hat{x}_t - \bar{x}_t, \frac{1}{N} \sum_{i=1}^N \sum_{q=0}^{Q-1} [\nabla_x f_i(x_{t,q}^i, y_{t,q}^i) - \nabla_x F(\bar{x}_t, \bar{y}_t)] \right\rangle \\
&\quad + 2\hat{c}\eta_x \mathbb{E} \langle \hat{x}_t - \bar{x}_t, Q \nabla_x F(\bar{x}_t, \bar{y}_t) \rangle \\
&\stackrel{(a)}{\leq} \mathbb{E} \|\hat{x}_t - \bar{x}_t\|^2 + (\hat{c}\eta_x)^2 \mathbb{E} \left[ \left\| \frac{1}{N} \sum_{i=1}^N \sum_{q=0}^{Q-1} \nabla_x f_i(x_{t,q}^i, y_{t,q}^i) \right\|^2 \right. \\
&\quad \left. + \left\| \frac{1}{N} \sum_{i=1}^N \sum_{q=0}^{Q-1} [\nabla_x f_i(x_{t,q}^i, y_{t,q}^i) - \nabla_x f_i(x_{t,q}^i, y_{t,q}^i; \mathcal{B}_{t,q}^i)] \right\|^2 \right] \\
&\quad + \hat{c}\eta_x \mathbb{E} \left[ \frac{QL_f}{2} \|\hat{x}_t - \bar{x}_t\|^2 + \frac{2}{QL_f} \left\| \frac{1}{N} \sum_{i=1}^N \sum_{q=0}^{Q-1} [\nabla_x f_i(x_{t,q}^i, y_{t,q}^i) - \nabla_x F(\bar{x}_t, \bar{y}_t)] \right\|^2 \right] \\
&\quad + 2\hat{c}\eta_x Q \mathbb{E} \langle \hat{x}_t - \bar{x}_t, \nabla_x F(\bar{x}_t, \bar{y}_t) \rangle \\
&\stackrel{(b)}{\leq} \mathbb{E} \|\hat{x}_t - \bar{x}_t\|^2 + Q(\hat{c}\eta_x)^2(QG_x^2 + \frac{\sigma^2}{N}) + \frac{Q\hat{c}\eta_x L_f}{2} \|\hat{x}_t - \bar{x}_t\|^2 \\
&\quad + \frac{2\hat{c}\eta_x L_f}{N} \sum_{i=1}^N \sum_{q=0}^{Q-1} \mathbb{E}(\|x_{t,q}^i - \bar{x}_t\|^2 + \|y_{t,q}^i - \bar{y}_t\|^2) + 2Q\hat{c}\eta_x \mathbb{E} \langle \hat{x}_t - \bar{x}_t, \nabla_x F(\bar{x}_t, \bar{y}_t) \rangle \quad (12)
\end{aligned}$$

where (a) follows from Assumption 3.1 (i) unbiasedness of stochastic gradients and Young's inequality; (b) follows from Assumption 3.4 to bound the gradient and 3.1 (ii) bound the variance and the smooth of  $f_i(x, y)$  in Assumption 3.3 . Next, we bound the last term in (12).

$$\begin{aligned}
\mathbb{E} \langle \hat{x}_t - \bar{x}_t, \nabla_x F(\bar{x}_t, \bar{y}_t) \rangle &\stackrel{(a)}{\leq} \mathbb{E} \left[ F(\hat{x}_t, \bar{y}_t) - F(\bar{x}_t, \bar{y}_t) + \frac{L_f}{2} \|\hat{x}_t - \bar{x}_t\|^2 \right] \\
&\stackrel{(b)}{\leq} \mathbb{E} \left[ \Phi(\hat{x}_t) - F(\bar{x}_t, \bar{y}_t) + \frac{L_f}{2} \|\hat{x}_t - \bar{x}_t\|^2 \right] \\
&= \mathbb{E} \left[ \Phi(\hat{x}_t) + L_f \|\hat{x}_t - \bar{x}_t\|^2 \right] - \mathbb{E} F(\bar{x}_t, \bar{y}_t) - \frac{L_f}{2} \mathbb{E} \|\hat{x}_t - \bar{x}_t\|^2 \\
&\stackrel{(c)}{\leq} \mathbb{E} \left[ \Phi(\bar{x}_t) + L_f \|\bar{x}_t - \bar{x}_t\|^2 \right] - \mathbb{E} F(\bar{x}_t, \bar{y}_t) - \frac{L_f}{2} \mathbb{E} \|\hat{x}_t - \bar{x}_t\|^2 \\
&= \mathbb{E} \left[ \Phi(\bar{x}_t) - F(\bar{x}_t, \bar{y}_t) - \frac{L_f}{2} \|\hat{x}_t - \bar{x}_t\|^2 \right] \quad (13)
\end{aligned}$$

where (a) holds by  $L_f$ -smoothness of  $f(x, \cdot)$  (Assumption 3.3); (b) uses the definition of  $\Phi(x)$ ; (c) uses the definition of  $\hat{x}$ . We also have

$$\Phi_{1/2L_f}(\bar{x}_{t+1}) = \min_x \Phi(x) + L_f \|x - \bar{x}_{t+1}\|^2 \leq \Phi(\hat{x}_t) + L_f \|\hat{x}_t - \bar{x}_{t+1}\|^2 \quad (14)$$



Combining the above (12), (13) and (14), we get

$$\begin{aligned}
& \mathbb{E} [\Phi_{1/2L_f}(\bar{x}_{t+1})] \\
& \leq \mathbb{E} \Phi(\hat{x}_t) + L_f \left[ \mathbb{E} \|\hat{x}_t - \bar{x}_t\|^2 + Q(\hat{c}\eta_x)^2(QG_x^2 + \frac{\sigma^2}{N}) \right] + \frac{Q\hat{c}\eta_x L_f^2}{2} \|\hat{x}_t - \bar{x}_t\|^2 \\
& + \frac{2\hat{c}\eta_x L_f^2}{N} \sum_{i=1}^N \sum_{q=0}^{Q-1} \mathbb{E} (\|x_{t,q}^i - \bar{x}_t\|^2 + \|y_{t,q}^i - \bar{y}_t\|^2) + 2Q\hat{c}\eta_x L_f \mathbb{E} \left[ \Phi(\bar{x}_t) - F(\bar{x}_t, \bar{y}_t) - \frac{L_f}{2} \|\hat{x}_t - \bar{x}_t\|^2 \right] \\
& \leq \mathbb{E} [\Phi_{1/2L_f}(\bar{x}_t)] + QL_f(\hat{c}\eta_x)^2(QG_x^2 + \frac{\sigma^2}{N}) + \frac{2\hat{c}\eta_x L_f^2}{N} \sum_{i=1}^N \sum_{q=0}^{Q-1} \mathbb{E} (\|x_{t,q}^i - \bar{x}_t\|^2 + \|y_{t,q}^i - \bar{y}_t\|^2) \\
& - \frac{Q\hat{c}\eta_x L_f^2}{2} \mathbb{E} \|\hat{x}_t - \bar{x}_t\|^2 + 2Q\hat{c}\eta_x L_f \mathbb{E} [\Phi(\bar{x}_t) - F(\bar{x}_t, \bar{y}_t)] \\
& \stackrel{(a)}{=} \mathbb{E} [\Phi_{1/2L_f}(\bar{x}_t)] + QL_f(\hat{c}\eta_x)^2(QG_x^2 + \frac{\sigma^2}{N}) + \frac{2\hat{c}\eta_x L_f^2}{N} \sum_{i=1}^N \sum_{q=0}^{Q-1} \mathbb{E} (\|x_{t,q}^i - \bar{x}_t\|^2 + \|y_{t,q}^i - \bar{y}_t\|^2) \\
& - \frac{Q\hat{c}\eta_x}{8} \mathbb{E} \|\nabla \Phi_{1/2L_f}(\bar{x}_t)\|^2 + 2Q\hat{c}\eta_x L_f \mathbb{E} [\Phi(\bar{x}_t) - F(\bar{x}_t, \bar{y}_t)]
\end{aligned}$$

where (a) holds due to the fact  $\nabla \Phi_{1/2L_f}(\hat{x}_t) = 2L_f(\hat{x}_t - \bar{x}_t)$  from Lemma 2.2 in [9]  $\square$

**Lemma B.2.** Suppose Assumptions 3.1, 3.2, 3.3, 3.4 hold and the sequences  $\{x_t, y_t\}$  are generated by Algorithm 1,  $c \leq \frac{1}{10QL_f}$  and  $\hat{c} \leq \frac{1}{10QL_f}$ , we have

$$\begin{aligned}
& \sum_{i=1}^N \sum_{q=0}^{Q-1} \mathbb{E} \left[ \|x_{t,q}^i - \bar{x}_t\|^2 + \|y_{t,q}^i - \bar{y}_t\|^2 \right] \\
& \leq \sum_{i=1}^N \left[ 3Q^2(\hat{c}^2 + c^2)(\sigma^2 + 6Q\zeta^2) + 18Q^3\hat{c}^2G_x^2 + 36L_fQ^3c^2\mathbb{E}[\Phi(\bar{x}_k) - F(\bar{x}_k, \bar{y}_t)] \right]
\end{aligned}$$

*Proof.*

$$\begin{aligned}
& \mathbb{E} \|x_{t,q}^i - \bar{x}_t\|^2 = \mathbb{E} \|x_{t,Q-1}^i - \bar{x}_t - \hat{c}\nabla_x f_i(x_{t,Q-1}^i, y_{t,Q-1}^i; \mathcal{B}_{t,Q-1}^i)\|^2 \\
& \leq \mathbb{E} \|x_{t,Q-1}^i - \bar{x}_t - \hat{c}[\nabla_x f_i(x_{t,Q-1}^i, y_{t,Q-1}^i; \mathcal{B}_{t,Q-1}^i) - \nabla_x f_i(x_{t,Q-1}^i, y_{t,Q-1}^i) + \nabla_x f_i(x_{t,Q-1}^i, y_{t,Q-1}^i) \\
& - \nabla_x f_i(\bar{x}_t, \bar{y}_t) + \nabla_x f_i(\bar{x}_t, \bar{y}_t) - \nabla_x f(\bar{x}_t, \bar{y}_t) + \nabla_x f(\bar{x}_t, \bar{y}_t)]\|^2 \\
& \leq (1 + \frac{1}{2Q-1}) \mathbb{E} \|x_{t,Q-1}^i - \bar{x}_t\|^2 + \mathbb{E} \|\hat{c}(\nabla_x f_i(x_{t,Q-1}^i, y_{t,Q-1}^i; \mathcal{B}_{t,Q-1}^i) - \nabla_x f_i(x_{t,Q-1}^i, y_{t,Q-1}^i))\|^2 \\
& + 6Q\mathbb{E} \|\hat{c}(\nabla_x f_i(x_{t,Q-1}^i, y_{t,Q-1}^i) - \nabla_x f_i(\bar{x}_t, \bar{y}_t))\|^2 + 6Q\mathbb{E} \|\hat{c}(\nabla_x f_i(\bar{x}_t, \bar{y}_t) - \nabla_x F(\bar{x}_t, \bar{y}_t))\|^2 \\
& + 6Q\|\hat{c}\nabla F(\bar{x}_t, \bar{y}_t)\|^2 \\
& \sum_{i=1}^N \mathbb{E} \|x_{t,q}^i - \bar{x}_t\|^2 \leq \sum_{i=1}^N \left[ (1 + \frac{1}{2Q-1}) \mathbb{E} \|x_{t,Q-1}^i - \bar{x}_t\|^2 + \hat{c}^2\sigma^2 \right. \\
& \left. + 6Q\hat{c}^2L_f^2\mathbb{E} \left[ \|x_{t,Q-1}^i - \bar{x}_t\|^2 + \|y_{t,Q-1}^i - \bar{y}_t\|^2 \right] + 6Q\hat{c}^2\zeta^2 + 6Q\hat{c}^2\|\nabla_x F(\bar{x}_t, \bar{y}_t)\|^2 \right] \quad (15)
\end{aligned}$$

The error bound  $\|y_{t,q}^i - \bar{y}_t\|^2$  follow a similar analysis but y updates with a fixed  $\bar{x}_k$ ,

$$\begin{aligned}
& \sum_{i=1}^N \mathbb{E} \|y_{t,q}^i - \bar{y}_t\|^2 = \sum_{i=1}^N \mathbb{E} \left[ \|y_{t,Q-1}^i - \bar{y}_t - c\nabla_y f_i(\bar{x}_k, y_{t,Q-1}^i; \mathcal{B}_{t,Q-1}^i)\|^2 \right] \\
& \leq \sum_{i=1}^N \left[ (1 + \frac{1}{2Q-1}) \mathbb{E} \|y_{t,Q-1}^i - \bar{y}_t\|^2 + c^2\sigma^2 + 6Qc^2L_f^2\mathbb{E} \|y_{t,Q-1}^i - \bar{y}_t\|^2 + 6Qc^2\zeta^2 \right. \\
& \left. + 6Qc^2\mathbb{E} \|\nabla_y F(\bar{x}_k, \bar{y}_t)\|^2 \right] \quad (16)
\end{aligned}$$

and we can get

$$\begin{aligned}
& \sum_{i=1}^N \mathbb{E} \left[ \|x_{t,q}^i - \bar{x}_t\|^2 + \|y_{t,q}^i - \bar{y}_t\|^2 \right] \\
& \leq \sum_{i=1}^N \left[ \left( 1 + \frac{1}{2Q-1} + 6Q\hat{c}^2 L_f^2 + 6Qc^2 L_f^2 \right) \mathbb{E} \left[ \|x_{t,Q-1}^i - \bar{x}_t\|^2 + \|\bar{y}_{t,Q-1}^i - \bar{y}_t\|^2 \right] + [\hat{c}^2 + c^2] \sigma^2 \right. \\
& \quad \left. + 6Q[\hat{c}^2 + c^2] \zeta^2 + 6Q\hat{c}^2 \mathbb{E} \|\nabla_x F(\bar{x}_t, \bar{y}_t)\|^2 + 6Qc^2 \mathbb{E} \|\nabla_y F(\bar{x}_k, \bar{y}_t)\|^2 \right] \\
& \leq \sum_{i=1}^N \left[ \left( 1 + \frac{1}{Q-1} \right) \mathbb{E} \left[ \|\bar{x}_{t,Q-1}^i - \bar{x}_t\|^2 + \|\bar{y}_{t,Q-1}^i - \bar{y}_t\|^2 \right] + (\hat{c}^2 + c^2) \sigma^2 + 6Q(\hat{c}^2 + c^2) \zeta^2 \right. \\
& \quad \left. + 6Q\hat{c}^2 \mathbb{E} \|\nabla_x F(\bar{x}_t, \bar{y}_t)\|^2 + 6Qc^2 \mathbb{E} \|\nabla_y F(\bar{x}_k, \bar{y}_t)\|^2 \right]
\end{aligned}$$

where the last inequality follows from the fact that  $\frac{1}{4Q-2} + 6Q(\hat{c})^2 L^2 \leq \frac{1}{2Q-2}$  if  $(\hat{c})^2 \leq \frac{1}{6(2(Q)^2 - 3Q + 1)L^2}$ . Similarly,  $\frac{1}{4Q-2} + 6Q(c)^2 L^2 \leq \frac{1}{2Q-2}$  if  $(c)^2 \leq \frac{1}{6(2(Q)^2 - 3Q + 1)L^2}$ . Unrolling the recursion, we obtain:

$$\begin{aligned}
& \sum_{i=1}^N \mathbb{E} \left[ \|x_{t,q}^i - \bar{x}_t\|^2 + \|y_{t,q}^i - \bar{y}_t\|^2 \right] \\
& \leq \sum_{i=1}^N \sum_{q=0}^{Q-1} \left( 1 + \frac{1}{Q-1} \right)^q \left[ (\hat{c}^2 + c^2) \sigma^2 + 6Q(\hat{c}^2 + c^2) \zeta^2 + 6Q\hat{c}^2 \mathbb{E} \|\nabla_x F(\bar{x}_t, \bar{y}_t)\|^2 \right. \\
& \quad \left. + 6Qc^2 \mathbb{E} \|\nabla_y F(\bar{x}_t, \bar{y}_t)\|^2 \right] \\
& \leq \sum_{i=1}^N (Q-1) \left[ \left( 1 + \frac{1}{Q-1} \right)^Q - 1 \right] \left[ (\hat{c}^2 + c^2) (\sigma^2 + 6Q\zeta^2) + 6Q\hat{c}^2 \mathbb{E} \|\nabla_x F(\bar{x}_t, \bar{y}_t)\|^2 \right. \\
& \quad \left. + 6Qc^2 \mathbb{E} \|\nabla_y F(\bar{x}_t, \bar{y}_t)\|^2 \right] \\
& \leq \sum_{i=1}^N \left[ 3Q(\hat{c}^2 + c^2) (\sigma^2 + 6Q\zeta^2) + 18Q^2 \hat{c}^2 \mathbb{E} \|\nabla_x F(\bar{x}_t, \bar{y}_t)\|^2 + 18Q^2 c^2 \mathbb{E} \|\nabla_y F(\bar{x}_k, \bar{y}_t)\|^2 \right]
\end{aligned} \tag{17}$$

where the third inequality holds due to  $(1 + \frac{1}{Q-1})^{Q-1} \leq e \leq 3$ . Furthermore, based on assumption Assumption 3.4 and Lemma A.1 (3), we have

$$\begin{aligned}
& \mathbb{E} \|\nabla_x F(\bar{x}_t, \bar{y}_t)\|^2 \leq G_x^2 \\
& \mathbb{E} \|\nabla_y F(\bar{x}_k, \bar{y}_t)\|^2 \leq 2L_f \mathbb{E} [\Phi(\bar{x}_k) - F(\bar{x}_k, \bar{y}_t)]
\end{aligned}$$

Putting , we get the final result.

$$\begin{aligned}
& \sum_{i=1}^N \sum_{q=0}^{Q-1} \mathbb{E} \left[ \|x_{t,q}^i - \bar{x}_t\|^2 + \|y_{t,q}^i - \bar{y}_t\|^2 \right] \\
& \leq \sum_{i=1}^N \left[ 3Q^2(\hat{c}^2 + c^2) (\sigma^2 + 6Q\zeta^2) + 18Q^3 \hat{c}^2 G_x^2 + 36L_f Q^3 c^2 \mathbb{E} [\Phi(\bar{x}_k) - F(\bar{x}_k, \bar{y}_t)] \right]
\end{aligned}$$

□

**Lemma B.3.** Suppose Assumptions 3.1, 3.2, 3.3, 3.4 hold and the sequences  $\{\bar{x}_t, \bar{y}_t\}$  are generated by Algorithm 1,  $\max\{c\eta_y, c\} \leq \frac{1}{10QL_f}$  and let  $\|\bar{y}_t\|^2 \leq D$ , we have

$$\begin{aligned} & \frac{1}{S} \sum_{t=kS}^{(k+1)S-1} \mathbb{E} [\Phi(\bar{x}_t) - F(\bar{x}_t, \bar{y}_t)] \\ & \leq 2G_x \eta_x \hat{c} (S-1) Q \sqrt{G_x^2 + \frac{\sigma^2}{N}} + \frac{D}{c\eta_y QS} + \frac{c\eta_y \sigma^2}{N} + [2(c\eta_y)QL_f^2 + L_f][3Q(c)^2(\sigma^2 + 6Q\zeta^2)] \end{aligned}$$

*Proof.* When  $t = kS$  to  $(k+1)S - 1$ , where  $k$  is a positive integer. Let  $\tilde{x}_k$  is the latest snapshot iterate in Algorithm 1. Then

$$\begin{aligned} & \mathbb{E} [\Phi(\bar{x}_t) - F(\bar{x}_t, \bar{y}_t)] \\ & = \mathbb{E} [F(\bar{x}_t, y^*(\bar{x}_t)) - F(\tilde{x}_k, y^*(\tilde{x}_k))] + \mathbb{E} [F(\tilde{x}_k, y^*(\tilde{x}_k)) - F(\tilde{x}_k, \bar{y}_t)] + \mathbb{E} [F(\tilde{x}_k, \bar{y}_t) - F(\bar{x}_t, \bar{y}_t)] \\ & \leq 2G_x \mathbb{E} \|\tilde{x}_k - \bar{x}_t\| + \mathbb{E} [F(\tilde{x}_k, y^*(\tilde{x}_k)) - F(\tilde{x}_k, \bar{y}_t)] \\ & = 2G_x \mathbb{E} \|\tilde{x}_k - \bar{x}_t\| + \mathbb{E} [\Phi(\tilde{x}_k) - F(\tilde{x}_k, \bar{y}_t)] \end{aligned} \quad (18)$$

where the last inequality follows from  $G_x$ -Lipschitz continuity of  $F(\cdot, y)$  (Assumption 3.4). For the first term, we have

$$\begin{aligned} 2G_x \mathbb{E} \|\bar{x}_t - \tilde{x}_k\| & = 2G_x \mathbb{E} \left\| \frac{\hat{c}\eta_x}{N} \sum_{t=kS+1}^{(k+1)S-1} \sum_{q=0}^{Q-1} \sum_{i=1}^N \nabla_x f_i(x_{t,q}^i, y_{t,q}^i; \mathcal{B}_{t,q}^i) \right\| \\ & = 2G_x \hat{c}\eta_x \sum_{t=kS+1}^{(k+1)S-1} \sum_{q=0}^{Q-1} \mathbb{E} \left\| \frac{1}{N} \sum_{i=1}^N \nabla_x f_i(x_{t,q}^i, y_{t,q}^i; \mathcal{B}_{t,q}^i) \right\| \\ & \leq 2G_x \eta_x \hat{c} (S-1) Q \sqrt{G_x^2 + \frac{\sigma^2}{N}} \end{aligned} \quad (19)$$

Next, we bound the second term in (18). During the updates of  $\{y_t^i\}$ , from  $t = kS$  to  $(k+1)S - 1$ , the variable  $\tilde{x}_k$  keep constant. The update of variable  $y$  likes maximizing a concave function  $f(\tilde{x}_k, \cdot)$  in the federated learning setting with local update as Q. Based on update step of variable  $y$ , we have

$$\begin{aligned} \|\bar{y}_{t+1} - y^*(\tilde{x}_k)\|^2 & = \left\| \bar{y}_t + c\eta_y \frac{1}{N} \sum_{i=1}^N \sum_{q=0}^{Q-1} \nabla_y f_i(\tilde{x}_k, y_{t,q}^i; \mathcal{B}_{t,q}^i) - y^*(\tilde{x}_k) \right\|^2 \\ & = \|\bar{y}_t - y^*(\tilde{x}_k)\|^2 + (c\eta_y)^2 \left\| \frac{1}{N} \sum_{i=1}^N \sum_{q=0}^{Q-1} \nabla_y f_i(\tilde{x}_k, y_{t,q}^i; \mathcal{B}_{t,q}^i) \right\|^2 \\ & \quad + 2c\eta_y \left\langle \bar{y}_t - y^*(\tilde{x}_k), \frac{1}{N} \sum_{i=1}^N \sum_{q=0}^{Q-1} \nabla_y f_i(\tilde{x}_k, y_{t,q}^i; \mathcal{B}_{t,q}^i) \right\rangle \end{aligned}$$

Taking expectation on the both side and we have

$$\begin{aligned} \mathbb{E} \|\bar{y}_{t+1} - y^*(\tilde{x}_k)\|^2 & = \mathbb{E} \|\bar{y}_t - y^*(\tilde{x}_k)\|^2 + (c\eta_y)^2 \mathbb{E} \left\| \frac{1}{N} \sum_{i=1}^N \sum_{q=0}^{Q-1} \nabla_y f_i(\tilde{x}_k, y_{t,q}^i; \mathcal{B}_{t,q}^i) \right\|^2 \\ & \quad + 2c\eta_y \mathbb{E} \left\langle \bar{y}_t - y^*(\tilde{x}_k), \frac{1}{N} \sum_{i=1}^N \sum_{q=0}^{Q-1} \nabla_y f_i(\tilde{x}_k, y_{t,q}^i; \mathcal{B}_{t,q}^i) \right\rangle \end{aligned} \quad (20)$$

Let  $r_t = \bar{y}_t - y^*(\tilde{x}_k)$ , and using Lemma A.1 (3) that

$$\mathbb{E} \|\nabla_y F(\tilde{x}_k, \bar{y}_t)\| \leq 2L_f \mathbb{E} [\Phi(\tilde{x}_k) - F(\tilde{x}_k, \bar{y}_t)] \quad (21)$$

$$\begin{aligned}
& \mathbb{E} \|r_{t+1}\|^2 \\
& \leq \|r_t\|^2 + (c\eta_y)^2 \mathbb{E} \left\| \frac{1}{N} \sum_{i=1}^N \sum_{q=0}^{Q-1} [\nabla_y f_i(\tilde{x}_k, y_{t,q}^i; \mathcal{B}_{t,q}^i) - \nabla_y f_i(\tilde{x}_k, y_{t,q}^i) + \nabla_y f_i(\tilde{x}_k, y_{t,q}^i) \right. \\
& \quad \left. - \nabla_y f_i(\tilde{x}_k, \bar{y}_t) + \nabla_y f_i(\tilde{x}_k, \bar{y}_t) \right\|^2 + 2c\eta_y \mathbb{E} \left\langle \bar{y}_t - y^*(\tilde{x}_k), \frac{1}{N} \sum_{i=1}^N \sum_{q=0}^{Q-1} \nabla_y f_i(\tilde{x}_k, y_{t,q}^i) \right\rangle \\
& \leq \|r_t\|^2 + (c\eta_y)^2 \mathbb{E} \left\| \frac{1}{N} \sum_{i=1}^N \sum_{q=0}^{Q-1} [\nabla_y f_i(\tilde{x}_k, y_{t,q}^i; \mathcal{B}_{t,q}^i) - \nabla_y f_i(\tilde{x}_k, y_{t,q}^i)] \right\|^2 \\
& \quad + 2(c\eta_y)^2 \mathbb{E} \left\| \frac{1}{N} \sum_{i=1}^N \sum_{q=0}^{Q-1} [\nabla_y f_i(\tilde{x}_k, y_{t,q}^i) - \nabla_y f_i(\tilde{x}_k, \bar{y}_t)] \right\|^2 + 2(c\eta_y)^2 \mathbb{E} \left\| \frac{1}{N} \sum_{i=1}^N \sum_{q=0}^{Q-1} \nabla_y f_i(\tilde{x}_k, \bar{y}_t) \right\|^2 \\
& \quad + 2c\eta_y \frac{1}{N} \sum_{i=1}^N \sum_{q=0}^{Q-1} \mathbb{E} \langle \bar{y}_t - y_{t,q}^i, \nabla_y f_i(\tilde{x}_k, y_{t,q}^i) \rangle + 2c\eta_y \frac{1}{N} \sum_{i=1}^N \sum_{q=0}^{Q-1} \mathbb{E} \langle y_{t,q}^i - y^*(\tilde{x}_k), \nabla_y f_i(\tilde{x}_k, y_{t,q}^i) \rangle \\
& \stackrel{(a)}{\leq} \|r_t\|^2 + \frac{(c\eta_y)^2 \sigma^2 Q}{N} + \frac{2(c\eta_y)^2 Q L_f^2}{N} \sum_{i=1}^N \sum_{q=0}^{Q-1} \mathbb{E} \|y_{t,q}^i - \bar{y}_t\|^2 + 4(c\eta_y)^2 Q^2 L_f \mathbb{E}[\Phi(\tilde{x}_k) - F(\tilde{x}_k, \bar{y}_t)] \\
& \quad + 2c\eta_y \frac{1}{N} \sum_{i=1}^N \sum_{q=0}^{Q-1} \mathbb{E}[f_i(\tilde{x}_k, \bar{y}_t) - f_i(\tilde{x}_k, y_{t,q}^i)] + \frac{L_f}{2} \|\bar{y}_t - y_{t,q}^i\|^2 + f_i(\tilde{x}_k, y_{t,q}^i) - f_i(\tilde{x}_k, y^*(\tilde{x}_k))] \\
& = \|r_t\|^2 + \frac{(c\eta_y)^2 \sigma^2 Q}{N} + \frac{2(c\eta_y)^2 Q L_f^2}{N} \sum_{i=1}^N \sum_{q=0}^{Q-1} \mathbb{E} \|y_{t,q}^i - \bar{y}_t\|^2 + 4(c\eta_y)^2 Q^2 L_f \mathbb{E}[\Phi(\tilde{x}_k) - F(\tilde{x}_k, \bar{y}_t)] \\
& \quad + 2c\eta_y \frac{1}{N} \sum_{i=1}^N \sum_{q=0}^{Q-1} \mathbb{E}[F(\tilde{x}_k, \bar{y}_t) + \frac{L_f}{2} \|\bar{y}_t - y_{t,q}^i\|^2 - F(\tilde{x}_k, y^*(\tilde{x}_k))] \\
& = \|r_t\|^2 + \frac{(c\eta_y)^2 \sigma^2 Q}{N} + \frac{2(c\eta_y)^2 Q L_f^2}{N} \sum_{i=1}^N \sum_{q=0}^{Q-1} \mathbb{E} \|y_{t,q}^i - \bar{y}_t\|^2 + 4(c\eta_y)^2 Q^2 L_f \mathbb{E}[\Phi(\tilde{x}_k) - F(\tilde{x}_k, \bar{y}_t)] \\
& \quad + c\eta_y L_f \frac{1}{N} \sum_{i=1}^N \sum_{q=0}^{Q-1} \mathbb{E} \|\bar{y}_t - y_{t,q}^i\|^2 - 2c\eta_y Q \mathbb{E}[\Phi(\tilde{x}_k) - F(\tilde{x}_k, \bar{y}_t)] \\
& \leq \|r_t\|^2 + \frac{(c\eta_y)^2 \sigma^2 Q}{N} + \frac{2(c\eta_y)^2 Q L_f^2 + c\eta_y L_f}{N} \sum_{i=1}^N \sum_{q=0}^{Q-1} \mathbb{E} \|y_{t,q}^i - \bar{y}_t\|^2 \\
& \quad - 2c\eta_y Q [1 - 2c\eta_y Q L_f] \mathbb{E}[\Phi(\tilde{x}_k) - F(\tilde{x}_k, \bar{y}_t)] \\
& \stackrel{(b)}{\leq} \|r_t\|^2 + \frac{(c\eta_y)^2 \sigma^2 Q}{N} + [2(c\eta_y)^2 Q L_f^2 + c\eta_y L_f] [3Q^2 (c)^2 (\sigma^2 + 6Q\zeta^2)] \\
& \quad - 2c\eta_y Q [1 - 2c\eta_y Q L_f - 36L_f^3 Q^3 (c\eta_y)^2 c^2 - 18L_f^2 Q^2 c^2] \mathbb{E}[\Phi(\tilde{x}_k) - F(\tilde{x}_k, \bar{y}_t)] \\
& \stackrel{(c)}{\leq} \|r_t\|^2 + \frac{(c\eta_y)^2 \sigma^2 Q}{N} + [2(c\eta_y)^2 Q L_f^2 + c\eta_y L_f] [3Q^2 c^2 (\sigma^2 + 6Q\zeta^2)] \\
& \quad - c\eta_y Q \mathbb{E}[\Phi(\tilde{x}_k) - F(\tilde{x}_k, \bar{y}_t)] \tag{22}
\end{aligned}$$

where (a) holds due to Lemma A.1 (3) that

$$\mathbb{E} \|\nabla_y F(\tilde{x}_k, \bar{y}_t)\| \leq 2L_f \mathbb{E}[\Phi(\tilde{x}_k) - F(\tilde{x}_k, \bar{y}_t)]$$

and the smoothness of  $f_i(\tilde{x}_k, \cdot)$

$$\mathbb{E} \langle \bar{y}_t - y_{t,q}^i, \nabla_y f_i(\tilde{x}_k, y_{t,q}^i) \rangle \leq f_i(\tilde{x}_k, \bar{y}_t) - f_i(\tilde{x}_k, y_{t,q}^i) + \frac{L_f}{2} \|\bar{y}_t - y_{t,q}^i\|^2$$

and concave property that

$$\mathbb{E} \langle y_{t,q}^i - y^*(\tilde{x}_k), \nabla_y f_i(\tilde{x}_k, y_{t,q}^i) \rangle \leq f_i(\tilde{x}_k, y_{t,q}^i) - f_i(\tilde{x}_k, y^*(\tilde{x}_k))$$

and (b) holds due to the (16) and following the analysis in (17), we have

$$\frac{1}{N} \sum_{i=1}^N \sum_{q=0}^{Q-1} \mathbb{E} \|y_{t,q}^i - \bar{y}_t\|^2 \leq 3Q^2 c^2 (\sigma^2 + 6Q\zeta^2) + 36L_f Q^3 c^2 \mathbb{E}[\Phi(\tilde{x}_k) - F(\tilde{x}_k, \bar{y}_t)]$$

and (c) holds due to  $\max\{c\eta_y, c\} \leq \frac{1}{10QL_f}$  and  $[1 - 2c\eta_y QL_f - 36L_f^3 Q^3 (c\eta_y)(c)^2 - 18L_f^2 Q^2 (c)^2] \geq \frac{1}{2}$

Furthermore, rearranging the terms in (22), and summing from  $t = kS$  to  $(k+1)S - 1$ , we have

$$\begin{aligned} & \frac{1}{S} \sum_{t=kS}^{(k+1)S-1} \mathbb{E} [\Phi(\tilde{x}_k) - f(\tilde{x}_k, \bar{y}_t)] \\ & \leq \frac{1}{S} \sum_{t=kS}^{(k+1)S-1} \left[ \frac{\|r_t\|^2 - \|r_{t+1}\|^2}{c\eta_y Q} + \frac{(c\eta_y)\sigma^2}{N} + [2(c\eta_y)QL_f^2 + L_f][3Qc^2(\sigma^2 + 6Q\zeta^2)] \right] \end{aligned} \quad (23)$$

Putting (19) and (23) into (18), let  $\|\bar{y}_t\|^2 \leq D$  for all  $t$ . we have

$$\begin{aligned} & \frac{1}{S} \sum_{t=kS}^{(k+1)S-1} \mathbb{E} [\Phi(\bar{x}_t) - F(\bar{x}_t, \bar{y}_t)] \\ & \leq 2G_x \eta_x \hat{c}(S-1)Q \sqrt{G_x^2 + \frac{\sigma^2}{N}} + \frac{1}{S} \sum_{t=kS}^{(k+1)S-1} \mathbb{E} [\Phi(\tilde{x}_k) - F(\tilde{x}_k, \bar{y}_t)] \\ & \leq 2G_x \eta_x \hat{c}(S-1)Q \sqrt{G_x^2 + \frac{\sigma^2}{N}} + \frac{D}{c\eta_y QS} + \frac{c\eta_y \sigma^2}{N} + [2(c\eta_y)QL_f^2 + L_f][3Q(c)^2(\sigma^2 + 6Q\zeta^2)] \end{aligned}$$

□

## B.2 Proof of Theorem

In this part, we show the Proof of Theorem 3.6.

*Proof.* Recall Lemma B.1

$$\begin{aligned} \mathbb{E} [\Phi_{1/2L_f}(\bar{x}_{t+1})] & \leq \mathbb{E} [\Phi_{1/2L_f}(\bar{x}_t)] + QL_f(\hat{c}\eta_x)^2(QG_x^2 + \frac{\sigma^2}{N}) - \frac{Q\hat{c}\eta_x}{8} \mathbb{E} \|\nabla \Phi_{1/2L_f}(\bar{x}_t)\|^2 \\ & + \frac{2\hat{c}\eta_x L_f^2}{N} \sum_{i=1}^N \sum_{q=0}^{Q-1} \mathbb{E} (\|x_{t,q}^i - \bar{x}_t\|^2 + \|y_{t,q}^i - \bar{y}_t\|^2) + 2Q\hat{c}\eta_x L_f \mathbb{E} [\Phi(\bar{x}_t) - F(\bar{x}_t, \bar{y}_t)] \end{aligned}$$

$$\begin{aligned}
& \frac{1}{T} \sum_{t=0}^{T-1} \mathbb{E} \|\nabla \Phi_{1/2L_f}(\bar{x}_t)\|^2 \leq 8 \frac{\mathbb{E}[\Phi_{1/2L_f}(\bar{x}_0)] - \mathbb{E}[\Phi_{1/2L_f}(\bar{x}_T)]}{Q\hat{c}\eta_x T} + 8L_f(\hat{c}\eta_x)(QG_x^2 + \frac{\sigma^2}{N}) \\
& + \frac{16L_f^2}{QNT} \sum_{t=0}^{T-1} \sum_{i=1}^N \sum_{q=0}^{Q-1} \mathbb{E}(\|x_{t,q}^i - \bar{x}_t\|^2 + \|y_{t,q}^i - \bar{y}_t\|^2) + \frac{16L_f}{T} \sum_{t=0}^{T-1} \mathbb{E}[\Phi(\bar{x}_t) - F(\bar{x}_t, \bar{y}_t)] \\
& \stackrel{(a)}{\leq} 8 \frac{\mathbb{E}[\Phi_{1/2L_f}(\bar{x}_0)] - \mathbb{E}[\Phi_{1/2L_f}(\bar{x}_T)]}{Q\hat{c}\eta_x T} + 8L_f(\hat{c}\eta_x)(QG_x^2 + \frac{\sigma^2}{N}) \\
& + 48L_f^2Q[\hat{c}^2 + c^2](\sigma^2 + 6Q\zeta^2) + 288L_f^2Q^2\hat{c}^2G_x^2 \\
& + \frac{576L_f^3Q^2c^2}{T} \sum_{k=0}^{T/S} \sum_{t=kS}^{(k+1)S-1} \mathbb{E}[\Phi(\bar{x}_k) - F(\bar{x}_k, \bar{y}_k)] + \frac{16L_f}{T} \sum_{t=0}^{T-1} \mathbb{E}[\Phi(\bar{x}_t) - F(\bar{x}_t, \bar{y}_t)] \\
& \stackrel{(b)}{\leq} 8 \frac{\mathbb{E}[\Phi_{1/2L_f}(\bar{x}_0)] - \mathbb{E}[\Phi_{1/2L_f}(\bar{x}_T)]}{Q\hat{c}\eta_x T} + 8L_f(\hat{c}\eta_x)(QG_x^2 + \frac{\sigma^2}{N}) \\
& + 48L_f^2Q[\hat{c}^2 + c^2](\sigma^2 + 6Q\zeta^2) + 288L_f^2Q^2\hat{c}^2G_x^2 \\
& + 576L_f^3Q^2c^2[\frac{D}{c\eta_y QS} + \frac{(c\eta_y)\sigma^2}{N} + 6L_fQ^2c^2(\sigma^2 + 6\zeta^2)] \\
& + 32L_fG_x\eta_x\hat{c}SQ\sqrt{G_x^2 + \frac{\sigma^2}{N}} + \frac{16L_fD}{c\eta_y QS} + \frac{16L_f(c\eta_y)\sigma^2}{N} + 96L_f^2Q^2c^2(\sigma^2 + 6\zeta^2)
\end{aligned}$$

where (a) holds due to Lemma B.2; (b) is using the (23) and Lemma B.3.

Let  $c = \hat{c} = \frac{1}{10L_fQT^{1/3}}$ ,  $Q = \frac{T^{1/3}}{N}$ ,  $\hat{c}\eta_x = \frac{N}{10L_fT}$ ,  $c\eta_y = \frac{1}{10L_fQ} = \frac{N}{10L_fT^{1/3}}$ ,  $S = T^{1/3}$

$$\begin{aligned}
& \frac{1}{T} \sum_{t=0}^{T-1} \mathbb{E} \|\nabla \Phi_{1/2L_f}(\bar{x}_t)\|^2 \\
& \leq \frac{80L_f\Delta}{T^{1/3}} + \frac{4(G_x^2 + \sigma^2)}{5T^{2/3}} + \frac{24(\sigma^2 + 6\zeta^2)}{25T^{2/3}} + \frac{72G_x^2}{25T^{2/3}} \\
& + \frac{144L_f}{25T^{2/3}} \left[ \frac{10L_fD}{T^{1/3}} + \frac{\sigma^2}{10L_fT^{1/3}} + \frac{3(\sigma^2 + 6\zeta^2)}{50L_fT^{2/3}} \right] \\
& + \frac{16G_x}{5T^{1/3}} \sqrt{G_x^2 + \frac{\sigma^2}{N}} + \frac{160L_f^2D}{T^{1/3}} + \frac{8\sigma^2}{5T^{1/3}} + \frac{24(\sigma^2 + 6\zeta^2)}{25T^{2/3}} \tag{24}
\end{aligned}$$

To make  $\frac{1}{T} \sum_{t=0}^{T-1} \mathbb{E} \|\nabla \Phi_{1/2L_f}(\bar{x}_t)\|^2 \leq \varepsilon^2$ , we have communication complexity  $T = O(\varepsilon^{-6})$ . Set  $b = O(1)$ ,  $QT = N^{-1}\varepsilon^{-8}$   $\square$

## C FedSGDA-M in Nonconvex-PL (NC-PL) setting

In this section, we provide the detailed convergence analysis of FedSGDA-M. For convenience, in the subsequent analysis, we define  $f_{t,i} = f_i(x_t^i, y_t^i)$ ,  $\nabla_x f_{t,i} = \nabla_x f_i(x_t^i, y_t^i)$  and  $\nabla_y f_{t,i} = \nabla_y f_i(x_t^i, y_t^i)$ .

$$\begin{aligned}
\bar{x}_t &= \frac{1}{N} \sum_{i=1}^N x_t^i & \bar{y}_t &= \frac{1}{N} \sum_{i=1}^N y_t^i & \bar{u}_t &= \frac{1}{N} \sum_{i=1}^N u_t^i & \bar{v}_t &= \frac{1}{N} \sum_{i=1}^N v_t^i \\
\nabla_x \bar{F}_t &= \frac{1}{N} \sum_{i=1}^N \nabla_x f_{t,i} = \frac{1}{N} \sum_{i=1}^N \nabla_x f_i(x_t^i, y_t^i) & \nabla_y \bar{F}_t &= \frac{1}{N} \sum_{i=1}^N \nabla_y f_{t,i} = \frac{1}{N} \sum_{i=1}^N \nabla_y f_i(x_t^i, y_t^i) \\
\nabla_x F(\bar{x}_t, \bar{y}_t) &= \frac{1}{N} \sum_{i=1}^N \nabla_x f_i(\bar{x}_t, \bar{y}_t) & \nabla_y F(\bar{x}_t, \bar{y}_t) &= \frac{1}{N} \sum_{i=1}^N \nabla_y f_i(\bar{x}_t, \bar{y}_t)
\end{aligned}$$

$s_t$  denotes the  $s_t = \lfloor t/Q \rfloor$ .

## C.1 Important Conclusions

**Lemma C.1.** Assume sequences  $\{\bar{x}_t, \bar{y}_t\}_{t=0}^T$  are generated from Algorithm 2,  $i \in [N]$ , we have

$$\mathbb{E}\|\nabla_x f_i(x_t^i, y_t^i; \mathcal{B}_t^i) - \nabla_x f_{t,i}\|^2 \leq \frac{\sigma^2}{b} \quad (25)$$

$$\mathbb{E}\|\nabla_y f_i(x_t^i, y_t^i; \mathcal{B}_t^i) - \nabla_y f_{t,i}\|^2 \leq \frac{\sigma^2}{b} \quad (26)$$

$$\sum_{i=1}^N \mathbb{E}\|\nabla_x f_{t,i} - \nabla_x \bar{F}_t\|^2 \leq 6L_f^2 \sum_{i=1}^N \mathbb{E}[\|x_t^i - \bar{x}_t\|^2 + \|y_t^i - \bar{y}_t\|^2] + 3N\zeta^2 \quad (27)$$

$$\sum_{i=1}^N \mathbb{E}\|\nabla_y f_{t,i} - \nabla_y \bar{F}_t\|^2 \leq 6L_f^2 \sum_{i=1}^N \mathbb{E}[\|x_t^i - \bar{x}_t\|^2 + \|y_t^i - \bar{y}_t\|^2] + 3N\zeta^2 \quad (28)$$

*Proof.* (1) we have

$$\begin{aligned} \mathbb{E}\|\nabla_x f_i(x_t^i, y_t^i; \mathcal{B}_t^i) - \nabla_x f_{t,i}\|^2 &= \mathbb{E}\left\|\frac{1}{b} \sum_{\xi_{t,i} \in \mathcal{B}_t^i} (\nabla_x f_i(x_t^i, y_t^i; \xi_{t,i}) - \nabla_x f_{t,i})\right\|^2 \\ &= \frac{1}{b^2} \sum_{\xi_{t,i} \in \mathcal{B}_t^i} \mathbb{E}\|\nabla_x f_i(x_t^i, y_t^i; \xi_{t,i}) - \nabla_x f_{t,i}\|^2 \leq \frac{\sigma^2}{b} \end{aligned}$$

where the second equality is due to  $\mathbb{E}_{\xi_{t,i}}[\nabla_x f_i(x_t^i, y_t^i; \xi_{t,i}) - \nabla_x f_{t,i}] = 0$  and the last inequality follows Assumptions 3.1. Similarly, we get the (26)

(2)

$$\begin{aligned} &\sum_{i=1}^N \mathbb{E}\|\nabla_x f_{t,i} - \nabla_x \bar{F}_t\|^2 \\ &\leq 3 \sum_{i=1}^N \mathbb{E}[\|\nabla_x f_{t,i} - \nabla_x f_i(\bar{x}_t, \bar{y}_t)\|^2 + \|\nabla_x F(\bar{x}_t, \bar{y}_t) - \nabla_x \bar{F}_t\|^2 + \|\nabla_x f_i(\bar{x}_t, \bar{y}_t) - \nabla_x F(\bar{x}_t, \bar{y}_t)\|^2] \\ &\leq 6L_f^2 \sum_{i=1}^N [\mathbb{E}\|x_t^i - \bar{x}_t\|^2 + \mathbb{E}\|y_t^i - \bar{y}_t\|^2] + 3N\zeta^2 \end{aligned}$$

where the last inequality is due to Assumption 3.3 and 3.1. Similarly, we get the (28)  $\square$

**Lemma C.2.** Suppose sequences  $\{\mathbf{x}_t, \mathbf{y}_t\}_{t=0}^T$  are generated from Algorithms 2. We have

$$\begin{aligned} \mathbb{E}\Phi(\bar{x}_{t+1}) &\leq \mathbb{E}\Phi(\bar{x}_t) - \left(\frac{\hat{c}\eta}{2} - \frac{\hat{c}^2\eta^2L}{2}\right) \mathbb{E}\|\bar{u}_{t+1}\|^2 + \frac{3\hat{c}\eta}{2} \mathbb{E}\|\bar{u}_{t+1} - \frac{1}{N} \sum_{i=1}^N \nabla_x f_i(x_t^i, y_t^i)\|^2 \\ &\quad - \frac{\hat{c}\eta}{2} \mathbb{E}\|\nabla\Phi(\bar{x}_t)\|^2 + \frac{3\hat{c}\eta L_f^2}{2N} \sum_{i=1}^N \mathbb{E}[\|x_t^i - \bar{x}_t\|^2 + \|y_t^i - \bar{y}_t\|^2] + \frac{3\hat{c}\eta L_f^2}{\mu} \mathbb{E}[\Phi(\bar{x}_t) - F(\bar{x}_t, \bar{y}_t)] \end{aligned}$$

*Proof.*

$$\begin{aligned} \Phi(\bar{x}_{t+1}) &\leq \Phi(\bar{x}_t) + \langle \nabla\Phi(\bar{x}_t), \bar{x}_{t+1} - \bar{x}_t \rangle + \frac{L}{2} \|\bar{x}_{t+1} - \bar{x}_t\|^2 \\ &= \Phi(\bar{x}_t) + \hat{c}\eta \langle \nabla\Phi(\bar{x}_t), \bar{u}_{t+1} \rangle + \frac{L\hat{c}^2\eta^2}{2} \|\bar{u}_{t+1}\|^2 \\ &= \Phi(\bar{x}_t) - \frac{\hat{c}\eta}{2} \|\bar{u}_{t+1}\|^2 - \frac{\hat{c}\eta}{2} \|\nabla\Phi(\bar{x}_t)\|^2 + \frac{\hat{c}\eta}{2} \|\bar{u}_{t+1} - \nabla\Phi(\bar{x}_t)\|^2 + \frac{\hat{c}^2\eta^2L}{2} \|\bar{u}_{t+1}\|^2 \\ &\leq \Phi(\bar{x}_t) - \frac{\hat{c}\eta}{2} \|\nabla\Phi(\bar{x}_t)\|^2 - \left(\frac{\hat{c}\eta}{2} - \frac{\hat{c}^2\eta^2L}{2}\right) \|\bar{u}_{t+1}\|^2 + \frac{3\hat{c}\eta}{2} \|\bar{u}_{t+1} - \frac{1}{N} \sum_{i=1}^N \nabla_x f_i(x_t^i, y_t^i)\|^2 \\ &\quad + \frac{3\hat{c}\eta}{2} \|\nabla_x F(\bar{x}_t, \bar{y}_t) - \frac{1}{N} \sum_{i=1}^N \nabla_x f_i(x_t^i, y_t^i)\|^2 + \frac{3\hat{c}\eta}{2} \|\nabla\Phi(\bar{x}_t) - \nabla_x F(\bar{x}_t, \bar{y}_t)\|^2 \end{aligned}$$

Taking expectation on both sides and considering

$$\begin{aligned}\mathbb{E}\|\nabla_x F(\bar{x}_t, \bar{y}_t) - \nabla_x \bar{F}_t\|^2 &\leq \frac{1}{N} \sum_{i=1}^N \mathbb{E}\|\nabla_x f_i(\bar{x}_t, \bar{y}_t) - \nabla_x f_{t,i}\|^2 \\ &\leq \frac{L_f^2}{N} \sum_{i=1}^N \mathbb{E}\|x_t^i - \bar{x}_t\|^2 + \frac{L_f^2}{N} \sum_{i=1}^N \mathbb{E}\|y_t^i - \bar{y}_t\|^2 \\ \mathbb{E}\|\nabla \Phi(\bar{x}_t) - \nabla_x F(\bar{x}_t, \bar{y}_t)\|^2 &\leq L_f^2 \mathbb{E}\|y^*(\bar{x}_t) - \bar{y}_t\|^2 \leq \frac{2L_f^2 \mathbb{E}[\Phi(\bar{x}_t) - F(\bar{x}_t, \bar{y}_t)]}{\mu}\end{aligned}$$

where the last inequality holds due to Lemma A.1 (2). Therefore, we obtain

$$\begin{aligned}\mathbb{E}\Phi(\bar{x}_{t+1}) &\leq \mathbb{E}\Phi(\bar{x}_t) - \left(\frac{\hat{c}\eta}{2} - \frac{\hat{c}^2\eta^2 L}{2}\right) \mathbb{E}\|\bar{u}_{t+1}\|^2 + \frac{3\hat{c}\eta}{2} \mathbb{E}\|\bar{u}_{t+1} - \frac{1}{N} \sum_{i=1}^N \nabla_x f_i(x_t^i, y_t^i)\|^2 \\ &\quad - \frac{\hat{c}\eta}{2} \mathbb{E}\|\nabla \Phi(\bar{x}_t)\|^2 + \frac{3\hat{c}\eta L_f^2}{2N} \sum_{i=1}^N \mathbb{E}[\|x_t^i - \bar{x}_t\|^2 + \|y_t^i - \bar{y}_t\|^2] + \frac{3\hat{c}\eta L_f^2}{\mu} \mathbb{E}[\Phi(\bar{x}_t) - F(\bar{x}_t, \bar{y}_t)]\end{aligned}$$

□

**Lemma C.3.** *Under the assumptions 3.1, 3.9 and 3.11, and set  $\hat{c} \leq \frac{c}{4\kappa^2}$  and  $\eta \leq \frac{1}{20QL_f}$ , for the Algorithm 2, we have*

$$\begin{aligned}&[\Phi(\bar{x}_{t+1}) - F(\bar{x}_{t+1}, \bar{y}_{t+1})] - [\Phi(\bar{x}_t) - F(\bar{x}_t, \bar{y}_t)] \\ &\leq -\frac{c\eta\mu}{2} [\Phi(\bar{x}_t) - F(\bar{x}_t, \bar{y}_t)] + \frac{\eta}{4\hat{c}} \|\hat{x}_{t+1} - \bar{x}_t\|^2 - \frac{\eta c}{4} \|\bar{v}_{t+1}\|^2 + \frac{3L_f^2 c\eta}{N} \sum_{i=1}^N \|x_t^i - \bar{x}_t\|^2 \\ &\quad + \frac{3L_f^2 c\eta}{N} \sum_{i=1}^N \|y_t^i - \bar{y}_t\|^2 + 3c\eta \|\bar{v}_{t+1} - \nabla_y \bar{F}_t\|^2\end{aligned}\tag{29}$$

where  $\kappa = L_{21}/\mu$ .

*Proof.* Define  $\hat{x}_{t+1} = \bar{x}_t - \hat{c}\bar{u}_{t+1}$  and  $\hat{y}_{t+1} = \bar{y}_t + c\bar{v}_{t+1}$ . The function  $F(x, y)$  is  $L_f$ -smooth w.r.t  $y$ , and we have

$$F(\bar{x}_{t+1}, \bar{y}_t) \leq F(\bar{x}_{t+1}, \bar{y}_{t+1}) - \langle \nabla_y F(\bar{x}_{t+1}, \bar{y}_t), \bar{y}_{t+1} - \bar{y}_t \rangle + \frac{L_f}{2} \|\bar{y}_{t+1} - \bar{y}_t\|^2\tag{30}$$

For the second term in the (30), we have

$$\begin{aligned}&-\langle \nabla_y F(\bar{x}_{t+1}, \bar{y}_t), \bar{y}_{t+1} - \bar{y}_t \rangle = -c\eta \langle \nabla_y F(\bar{x}_{t+1}, \bar{y}_t), \bar{v}_{t+1} \rangle \\ &= -\frac{c\eta}{2} \left[ \|\nabla_y F(\bar{x}_{t+1}, \bar{y}_t)\|^2 + \|\bar{v}_{t+1}\|^2 - \|\nabla_y F(\bar{x}_{t+1}, \bar{y}_t) - \nabla_y F(\bar{x}_t, \bar{y}_t) + \nabla_y F(\bar{x}_t, \bar{y}_t) - \bar{v}_{t+1}\|^2 \right] \\ &\leq -c\eta\mu [\Phi(\bar{x}_{t+1}) - F(\bar{x}_{t+1}, \bar{y}_t)] - \frac{c\eta}{2} \|\bar{v}_{t+1}\|^2 + c\eta \left[ L_f^2 \|\bar{x}_{t+1} - \bar{x}_t\|^2 + \|\nabla_y F(\bar{x}_t, \bar{y}_t) - \bar{v}_{t+1}\|^2 \right]\end{aligned}$$

where the last inequality from the quadratic growth condition of  $\mu$ -PL functions (9), Combining above two inequalities, we get

$$\begin{aligned}F(\bar{x}_{t+1}, \bar{y}_t) &\leq F(\bar{x}_{t+1}, \bar{y}_{t+1}) - c\eta\mu [\Phi(\bar{x}_{t+1}) - F(\bar{x}_{t+1}, \bar{y}_t)] - \frac{c\eta}{2} \|\bar{v}_{t+1}\|^2 \\ &\quad + \frac{L_f}{2} \|\bar{y}_{t+1} - \bar{y}_t\|^2 + c\eta \left[ L_f^2 \|\bar{x}_{t+1} - \bar{x}_t\|^2 + \|\nabla_y F(\bar{x}_t, \bar{y}_t) - \bar{v}_{t+1}\|^2 \right]\end{aligned}$$

Rearranging the above inequality, we get

$$\begin{aligned}\Phi(\bar{x}_{t+1}) - F(\bar{x}_{t+1}, \bar{y}_{t+1}) &\leq (1 - c\eta\mu) [\Phi(\bar{x}_{t+1}) - F(\bar{x}_{t+1}, \bar{y}_t)] - \frac{c\eta - L_f c^2 \eta^2}{2} \|\bar{v}_{t+1}\|^2 \\ &\quad + c\eta \left[ L_f^2 \|\bar{x}_{t+1} - \bar{x}_t\|^2 + \|\nabla_y F(\bar{x}_t, \bar{y}_t) - \bar{v}_{t+1}\|^2 \right]\end{aligned}\tag{31}$$



Furthermore, we bound  $\Phi(\bar{x}_{t+1}) - F(\bar{x}_{t+1}, \bar{y}_t)$

$$\begin{aligned} & \Phi(\bar{x}_{t+1}) - F(\bar{x}_{t+1}, \bar{y}_t) \\ &= \Phi(\bar{x}_{t+1}) - \Phi(\bar{x}_t) + [\Phi(\bar{x}_t) - F(\bar{x}_t, \bar{y}_t)] + F(\bar{x}_t, \bar{y}_t) - F(\bar{x}_{t+1}, \bar{y}_t). \end{aligned} \quad (32)$$

Considering the last two terms, we have

$$\begin{aligned} & F(\bar{x}_t, \bar{y}_t) - F(\bar{x}_{t+1}, \bar{y}_t) \\ & \stackrel{(a)}{\leq} -\langle \nabla_x F(\bar{x}_t, \bar{y}_t), \bar{x}_{t+1} - \bar{x}_t \rangle + \frac{L_f}{2} \|\bar{x}_{t+1} - \bar{x}_t\|^2 \\ & \stackrel{(b)}{=} -\eta \langle \nabla_x F(\bar{x}_t, \bar{y}_t) - \nabla \Phi(\bar{x}_t), \hat{x}_{t+1} - \bar{x}_t \rangle - \eta \langle \nabla \Phi(\bar{x}_t), \hat{x}_{t+1} - \bar{x}_t \rangle + \frac{L_f}{2} \|\bar{x}_{t+1} - \bar{x}_t\|^2 \\ & \stackrel{(c)}{\leq} \frac{\eta}{8\hat{c}} \|\hat{x}_{t+1} - \bar{x}_t\|^2 + 2\hat{c}\eta \|\nabla_x F(\bar{x}_t, \bar{y}_t) - \nabla \Phi(\bar{x}_t)\|^2 + \Phi(\bar{x}_t) - \Phi(\bar{x}_{t+1}) + \frac{L + L_f}{2} \|\bar{x}_{t+1} - \bar{x}_t\|^2 \\ & \stackrel{(d)}{\leq} \frac{\eta}{8\hat{c}} \|\hat{x}_{t+1} - \bar{x}_t\|^2 + \frac{4\hat{c}\eta L_f^2}{\mu} [\Phi(\bar{x}_t) - F(\bar{x}_t, \bar{y}_t)] + \Phi(\bar{x}_t) - \Phi(\bar{x}_{t+1}) + \frac{L + L_f}{2} \|\bar{x}_{t+1} - \bar{x}_t\|^2 \\ & \leq \frac{4\hat{c}\eta L_f^2}{\mu} [\Phi(\bar{x}_t) - F(\bar{x}_t, \bar{y}_t)] + \Phi(\bar{x}_t) - \Phi(\bar{x}_{t+1}) + L \|\bar{x}_{t+1} - \bar{x}_t\|^2 + \frac{\eta}{8\hat{c}} \|\hat{x}_{t+1} - \bar{x}_t\|^2 \\ & = \frac{4\hat{c}\eta L_f^2}{\mu} [\Phi(\bar{x}_t) - F(\bar{x}_t, \bar{y}_t)] + \Phi(\bar{x}_t) - \Phi(\bar{x}_{t+1}) + [\eta^2 L + \frac{\eta}{8\hat{c}}] \|\hat{x}_{t+1} - \bar{x}_t\|^2 \end{aligned} \quad (33)$$

where (a) holds due to  $L_f$ -smoothness of  $F(\cdot, y_t)$ ; (b) holds due to the definition of  $\hat{x}_{t+1}$  and  $\bar{x}_{t+1} - \bar{x}_t = \eta(\hat{x}_{t+1} - \bar{x}_t)$ ; (c) follows from Young inequality and smoothness of  $\Phi(\cdot)$ ; (d) follows by the property of PL condition (8). Combining (31), (32) and (33), we have

$$\begin{aligned} & \Phi(\bar{x}_{t+1}) - F(\bar{x}_{t+1}, \bar{y}_{t+1}) \\ & \leq (1 - c\eta\mu) \left[ \left( 1 + \frac{4\hat{c}\eta L_f^2}{\mu} \right) [\Phi(\bar{x}_t) - F(\bar{x}_t, \bar{y}_t)] + [\eta^2 L + \frac{\eta}{8\hat{c}}] \|\hat{x}_{t+1} - \bar{x}_t\|^2 \right] \\ & \quad - \frac{c\eta - L_f c^2 \eta^2}{2} \|\bar{v}_{t+1}\|^2 + c\eta \left[ L_f^2 \|\bar{x}_{t+1} - \bar{x}_t\|^2 + \|\nabla_y F(\bar{x}_t, \bar{y}_t) - \bar{v}_{t+1}\|^2 \right] \\ & \stackrel{(a)}{\leq} \left( 1 - \frac{c\eta\mu}{2} \right) [\Phi(\bar{x}_t) - F(\bar{x}_t, \bar{y}_t)] + [\eta^2 L + \frac{\eta}{8\hat{c}} + \eta^3 L_f^2 c] \|\hat{x}_{t+1} - \bar{x}_t\|^2 \\ & \quad - \frac{c\eta - L_f c^2 \eta^2}{2} \|\bar{v}_{t+1}\|^2 + c\eta \|\nabla_y F(\bar{x}_t, \bar{y}_t) - \bar{v}_{t+1}\|^2 \\ & \stackrel{(b)}{\leq} \left( 1 - \frac{c\eta\mu}{2} \right) [\Phi(\bar{x}_t) - F(\bar{x}_t, \bar{y}_t)] + \frac{\eta}{4\hat{c}} \|\hat{x}_{t+1} - \bar{x}_t\|^2 - \frac{\eta c}{4} \|\bar{v}_{t+1}\|^2 \\ & \quad + c\eta \|\nabla_y F(\bar{x}_t, \bar{y}_t) - \bar{v}_{t+1}\|^2 \end{aligned} \quad (34)$$

where in (a) we need  $(1 - c\eta\mu) \left( 1 + \frac{4\hat{c}\eta L_f^2}{\mu} \right) \leq (1 - \frac{c\eta\mu}{2})$ . This holds if  $\frac{4\hat{c}\eta L_f^2}{\mu} \leq \frac{c\eta\mu}{2} \Rightarrow \hat{c} \leq \frac{c}{8\kappa^2}$ ; (b) follows since  $\eta \leq \frac{1}{20\hat{c}L_f}$  and  $c\eta \leq \frac{1}{20L_f}$ . Rearranging the term, we have

$$\begin{aligned} & [\Phi(\bar{x}_{t+1}) - F(\bar{x}_{t+1}, \bar{y}_{t+1})] - [\Phi(\bar{x}_t) - F(\bar{x}_t, \bar{y}_t)] \\ & \leq -\frac{c\eta\mu}{2} [\Phi(\bar{x}_t) - F(\bar{x}_t, \bar{y}_t)] + \frac{\eta}{4\hat{c}} \|\hat{x}_{t+1} - \bar{x}_t\|^2 - \frac{\eta c}{4} \|\bar{v}_{t+1}\|^2 + c\eta \|\nabla_y F(\bar{x}_t, \bar{y}_t) - \bar{v}_{t+1}\|^2 \\ & \leq -\frac{c\eta\mu}{2} [\Phi(\bar{x}_t) - F(\bar{x}_t, \bar{y}_t)] + \frac{\eta}{4\hat{c}} \|\hat{x}_{t+1} - \bar{x}_t\|^2 - \frac{\eta c}{4} \|\bar{v}_{t+1}\|^2 + \frac{3L_f^2 c\eta}{N} \|\bar{x}_t - \bar{x}_t\|^2 \\ & \quad + \frac{3L_f^2 c\eta}{N} \|\bar{y}_t - \bar{y}_t\|^2 + 3c\eta \|\bar{v}_{t+1} - \nabla_y \bar{F}_t\|^2 \end{aligned} \quad (35)$$

where  $\|\nabla_y F(\bar{x}_t, \bar{y}_t) - \bar{v}_{t+1}\|^2 \leq \frac{3L_f^2}{N} \sum_{i=1}^N \|x_t^i - \bar{x}_t\|^2 + \frac{3L_f^2}{N} \sum_{i=1}^N \|y_t^i - \bar{y}_t\|^2 + 3\|\bar{v}_{t+1} - \nabla_y \bar{F}_t\|^2$   $\square$

**Lemma C.4.** For every  $t \in [0, T]$  the iterates generated by Algorithm 2 satisfy

$$\begin{aligned}\mathbb{E}\|\bar{u}_{t+1} - \nabla_x \bar{F}_t\|^2 &= (1 - \alpha)^2 \mathbb{E}\|\bar{u}_t - \nabla_x \bar{F}_{t-1}\|^2 + \frac{8(1 - \alpha)^2 L_f^2}{N^2 b} \frac{Q - 1}{Q} \sum_{i=1}^N \mathbb{E}[\hat{c}^2 \eta^2 \|u_t^i - \bar{u}_t\|^2] \\ &\quad + c^2 \eta^2 \|v_t^i - \bar{v}_t\|^2 + \frac{4(1 - \alpha)^2 L_f^2}{Nb} \mathbb{E}[\hat{c}^2 \eta^2 \|\bar{u}_t\|^2 + c^2 \eta^2 \|\bar{v}_t\|^2] + \frac{2\alpha^2 \sigma^2}{Nb} \\ \mathbb{E}\|\bar{v}_{t+1} - \nabla_y \bar{F}_t\|^2 &= (1 - \beta)^2 \mathbb{E}\|\bar{v}_t - \nabla_y \bar{F}_{t-1}\|^2 + \frac{8(1 - \beta)^2 L_f^2}{N^2 b} \frac{Q - 1}{Q} \sum_{i=1}^N \mathbb{E}[\hat{c}^2 \eta^2 \|u_t^i - \bar{u}_t\|^2] \\ &\quad + c^2 \eta^2 \|v_t^i - \bar{v}_t\|^2 + \frac{4(1 - \beta)^2 L_f^2}{Nb} \mathbb{E}[\hat{c}^2 \eta^2 \|\bar{u}_t\|^2 + c^2 \eta^2 \|\bar{v}_t\|^2] + \frac{2\beta^2 \sigma^2}{Nb}\end{aligned}$$

*Proof.* We borrow the proof steps from Lemma A.6 [34], which study the application of momentum-based variance reduced technology in FL. Recall the definition of momentum-based variance reduced estimator  $\bar{u}_{t+1} = \frac{1}{N} \sum_{i=1}^N [\nabla_x f_i(x_t^i, y_t^i; \mathcal{B}_t^i) + (1 - \alpha)(\bar{u}_t - \nabla_x f_i(x_{t-1}^i, y_{t-1}^i; \mathcal{B}_t^i))]$  and  $\bar{v}_{t+1} = \frac{1}{N} \sum_{i=1}^N [\nabla_y f_i(x_t^i, y_t^i; \mathcal{B}_t^i) + (1 - \beta)(\bar{v}_t - \nabla_y f_i(x_{t-1}^i, y_{t-1}^i; \mathcal{B}_t^i))]$ , we have easily get the final results.  $\square$

**Lemma C.5.** Assume that the stochastic partial derivatives  $\{\bar{u}_t\}$  and  $\{\bar{v}_t\}$  are generated from Algorithm 2, and set  $s_t = \lfloor t/Q \rfloor$ ,  $\eta \leq \frac{1}{20QL}$ ,  $\alpha = c_1 \eta^2$ ,  $\beta = c_2 \eta^2$ , where we set  $c_1 \leq \frac{30L^2}{bN}$  and  $c_2 \leq \frac{30L^2}{bN}$ , we have

$$\begin{aligned}\frac{2}{5N} \sum_{t=s_t Q}^{\bar{s}} \sum_{i=1}^N \mathbb{E}[\|u_t^i - \bar{u}_t\|^2 + \|v_t^i - \bar{v}_t\|^2] &\leq \frac{1}{12} \sum_{t=s_t Q}^{\bar{s}} \mathbb{E}[\hat{c}^2 \|\bar{u}_t\|^2 + c^2 \|\bar{v}_t\|^2] \\ &+ \left[ \frac{\sigma^2(c_1^2 + c_2^2)}{30bL^2} + \frac{\zeta^2(c_1^2 + c_2^2)}{12L^2} \right] \sum_{t=s_t Q}^{\bar{s}} \eta^2\end{aligned}\tag{36}$$

*Proof.*

$$\begin{aligned}&\sum_{i=1}^N \mathbb{E}\|u_{t+1}^i - \bar{u}_{t+1}\|^2 \\ &= \sum_{i=1}^N \mathbb{E}\|\nabla_x f_i(x_t^i, y_t^i; \mathcal{B}_t^i) + (1 - \alpha)(u_t^i - \nabla_x f_i(x_{t-1}^i, y_{t-1}^i; \mathcal{B}_t^i)) \\ &\quad - \frac{1}{N} \sum_{j=1}^N [\nabla_x f_j(x_t^j, y_t^j; \mathcal{B}_t^j) + (1 - \alpha)(u_t^j - \nabla_x f_j(x_{t-1}^j, y_{t-1}^j; \mathcal{B}_t^j))]\|^2 \\ &= \sum_{i=1}^N \mathbb{E}\|(1 - \alpha)(u_t^i - \bar{u}_t) + [\nabla_x f_i(x_t^i, y_t^i; \mathcal{B}_t^i) - \frac{1}{N} \sum_{i=1}^N \nabla_x f_j(x_t^j, y_t^j; \mathcal{B}_t^j) \\ &\quad - (1 - \alpha)[\nabla_x f_i(x_{t-1}^i, y_{t-1}^i; \mathcal{B}_t^i) - \frac{1}{N} \sum_{j=1}^N \nabla_x f_j(x_{t-1}^j, y_{t-1}^j; \mathcal{B}_t^j)]\|^2 \\ &\stackrel{(a)}{\leq} (1 + \gamma)(1 - \alpha)^2 \sum_{i=1}^N \mathbb{E}\|u_t^i - \bar{u}_t\|^2 \\ &\quad + (1 + \frac{1}{\gamma}) \sum_{i=1}^N \mathbb{E}\|[\nabla_x f_i(x_t^i, y_t^i; \mathcal{B}_t^i) - \frac{1}{N} \sum_{j=1}^N \nabla_x f_j(x_t^j, y_t^j; \mathcal{B}_t^j)] \\ &\quad - (1 - \alpha)[\nabla_x f_i(x_{t-1}^i, y_{t-1}^i; \mathcal{B}_t^i) - \frac{1}{N} \sum_{j=1}^N \nabla_x f_j(x_{t-1}^j, y_{t-1}^j; \mathcal{B}_t^j)]\|^2\end{aligned}$$

where (a) is due to Young's inequality. For the second term, we have

$$\begin{aligned}
& \sum_{i=1}^N \mathbb{E} \|\nabla_x f_i(x_t^i, y_t^i; \mathcal{B}_t^i) - \frac{1}{N} \sum_{j=1}^N \nabla_x f_j(x_t^j, y_t^j; \mathcal{B}_t^j)\| \\
& - (1 - \alpha) \|\nabla_x f_i(x_{t-1}^i, y_{t-1}^i; \mathcal{B}_t^i) - \frac{1}{N} \sum_{j=1}^N \nabla_x f_j(x_{t-1}^j, y_{t-1}^j; \mathcal{B}_t^j)\|^2 \\
& \leq 2 \sum_{i=1}^N \mathbb{E} \|\nabla_x f_i(x_t^i, y_t^i; \mathcal{B}_t^i) - \frac{1}{N} \sum_{j=1}^N \nabla_x f_j(x_t^j, y_t^j; \mathcal{B}_t^j)\| \\
& - \|\nabla_x f_i(x_{t-1}^i, y_{t-1}^i; \mathcal{B}_t^i) - \frac{1}{N} \sum_{j=1}^N \nabla_x f_j(x_{t-1}^j, y_{t-1}^j; \mathcal{B}_t^j)\|^2 \\
& + 2\alpha^2 \sum_{i=1}^N \mathbb{E} \|\nabla_x f_i(x_{t-1}^i, y_{t-1}^i; \mathcal{B}_t^i) - \frac{1}{N} \sum_{j=1}^N \nabla_x f_j(x_{t-1}^j, y_{t-1}^j; \mathcal{B}_t^j)\|^2 \\
& \stackrel{(a)}{\leq} 2 \sum_{i=1}^N \mathbb{E} \|\nabla_x f_i(x_t^i, y_t^i; \mathcal{B}_t^i) - \nabla_x f_i(x_{t-1}^i, y_{t-1}^i; \mathcal{B}_t^i)\|^2 \\
& + 2\alpha^2 \sum_{i=1}^N \mathbb{E} \|\nabla_x f_i(x_{t-1}^i, y_{t-1}^i; \mathcal{B}_t^i) - \frac{1}{N} \sum_{j=1}^N \nabla_x f_j(x_{t-1}^j, y_{t-1}^j; \mathcal{B}_t^j)\|^2 \\
& \stackrel{(b)}{\leq} 2L_f^2 \sum_{i=1}^N \mathbb{E} [\|x_t^i - x_{t-1}^i\|^2 + \|y_t^i - y_{t-1}^i\|^2] + 2\alpha^2 \sum_{i=1}^N \mathbb{E} \|\nabla_x f_i(x_{t-1}^i, y_{t-1}^i; \mathcal{B}_t^i) \\
& - \frac{1}{N} \sum_{j=1}^N \nabla_x f_j(x_{t-1}^j, y_{t-1}^j; \mathcal{B}_t^j)\|^2
\end{aligned}$$

where (a) is due to Lemma A.2; (b) is due to Assumption 3.9. For the last term in the above inequality, we have

$$\begin{aligned}
& \sum_{i=1}^N \mathbb{E} \|\nabla_x f_i(x_{t-1}^i, y_{t-1}^i; \mathcal{B}_t^i) - \frac{1}{N} \sum_{j=1}^N \nabla_x f_j(x_{t-1}^j, y_{t-1}^j; \mathcal{B}_t^j)\|^2 \\
& = \sum_{i=1}^N \mathbb{E} \|\nabla_x f_i(x_{t-1}^i, y_{t-1}^i; \mathcal{B}_t^i) - \nabla_x f_{t-1,i} - \frac{1}{N} \sum_{j=1}^N [\nabla_x f_j(x_{t-1}^j, y_{t-1}^j; \mathcal{B}_t^j) - \nabla_x f_{t-1,j}]\| \\
& + \|\nabla_x f_{t-1,i} - \nabla_x \bar{F}_{t-1}\|^2 \\
& \leq 2 \sum_{i=1}^N \mathbb{E} \|\nabla_x f_i(x_{t-1}^i, y_{t-1}^i; \mathcal{B}_t^i) - \nabla_x f_{t-1,i} - \frac{1}{N} \sum_{j=1}^N [\nabla_x f_j(x_{t-1}^j, y_{t-1}^j; \mathcal{B}_t^j) - \nabla_x f_{t-1,j}]\|^2 \\
& + 2 \sum_{i=1}^N \mathbb{E} \|\nabla_x f_{t-1,i} - \nabla_x \bar{F}_{t-1}\|^2 \\
& \stackrel{(a)}{\leq} 2 \sum_{i=1}^N \mathbb{E} \|\nabla_x f_i(x_{t-1}^i, y_{t-1}^i; \mathcal{B}_t^i) - \nabla_x f_{t-1,i}\|^2 + 2 \sum_{i=1}^N \mathbb{E} \|\nabla_x f_{t-1,i} - \nabla_x \bar{F}_{t-1}\|^2 \\
& \stackrel{(b)}{\leq} \frac{2N\sigma^2}{b} + 6N\zeta^2 + 12L_f^2 \sum_{i=1}^N \mathbb{E} \|x_{t-1}^i - \bar{x}_{t-1}\|^2 + 12L_f^2 \sum_{i=1}^N \mathbb{E} \|y_{t-1}^i - \bar{y}_{t-1}\|^2 \tag{37}
\end{aligned}$$

where (a) is due to Lemma A.2 and the last inequality is due to Lemma C.1. Therefore, by combining above inequalities, we have

$$\begin{aligned}
& \sum_{i=1}^N \mathbb{E} \|u_{t+1}^i - \bar{u}_{t+1}\|^2 \leq (1-\alpha)^2(1+\gamma) \sum_{i=1}^N \mathbb{E} \|u_t^i - \bar{u}_t\|^2 + \frac{4N\sigma^2}{b} (1+\frac{1}{\gamma})\alpha^2 \\
& + 12N\zeta^2(1+\frac{1}{\gamma})\alpha^2 + 2L_f^2(1+\frac{1}{\gamma}) \sum_{i=1}^N \mathbb{E} [\|x_{t,i} - x_{t-1}^i\|^2 + \|y_t^i - y_{t-1}^i\|^2] \\
& + 24L_f^2(1+\frac{1}{\gamma})\alpha^2 \sum_{i=1}^N \mathbb{E} [\|x_{t-1}^i - \bar{x}_{t-1,i}\|^2 + \|y_{t-1}^i - \bar{y}_{t-1,i}\|^2] \\
& \leq (1-\alpha)^2(1+\gamma) \sum_{i=1}^N \mathbb{E} \|u_t^i - \bar{u}_t\|^2 + \frac{4N\sigma^2}{b} (1+\frac{1}{\gamma})\alpha^2 + 12N\zeta^2(1+\frac{1}{\gamma})\alpha^2 \\
& + 4L_f^2(1+\frac{1}{\gamma}) \sum_{i=1}^N \mathbb{E} [\|\hat{c}\eta(u_t^i - \bar{u}_t)\|^2 + \|\hat{c}\eta\bar{u}_t\|^2 + \|c\eta(v_t^i - \bar{v}_t)\|^2 + \|c\eta\bar{v}_t\|^2] \\
& + 24L_f^2(1+\frac{1}{\gamma})\alpha^2(Q-1) \sum_{s=s_t+1}^{t-1} \eta^2 \sum_{i=1}^N \mathbb{E} [\|\hat{c}(u_s^i - \bar{u}_s)\|^2 + \|c(v_s^i - \bar{v}_s)\|^2] \quad (38)
\end{aligned}$$

where the inequality is due to the update step 11 in algorithm 2 and the fact that. (1) if  $t = s_t Q$ , we have

$$\sum_{i=1}^N \|x_{s_t Q}^i - \bar{x}_{s_t Q}\|^2 = 0 \quad (39)$$

(2) if  $t \geq s_t Q$ , we have

$$\begin{aligned}
\sum_{i=1}^N \|x_t^i - \bar{x}_t\|^2 &= \sum_{i=1}^N \left\| x_{s_t Q}^i - \bar{x}_{s_t Q} - \left( \sum_{s=s_t Q}^{t-1} \hat{c}\eta u_{s+1}^i - \sum_{s=s_t Q}^{t-1} \hat{c}\eta \bar{u}_{s+1} \right) \right\|^2 \\
&= \sum_{i=1}^N \left\| \sum_{s=s_t Q}^{t-1} \hat{c}\eta [u_{s+1}^i - \bar{u}_{s+1}] \right\|^2 \\
&\leq (Q-1) \sum_{s=s_t Q}^{t-1} \hat{c}^2 \eta^2 \sum_{i=1}^N \|u_{s+1}^i - \bar{u}_{s+1}\|^2 \quad (40)
\end{aligned}$$

Given that  $\alpha, \beta, \hat{c}, c \leq 1$ , then based on (38), we have

$$\begin{aligned}
& \sum_{i=1}^N \mathbb{E} [\|u_{t+1}^i - \bar{u}_{t+1}\|^2 + \|v_{t+1}^i - \bar{v}_{t+1}\|^2] \\
& = [(1+\gamma) + 8L_f^2(1+\frac{1}{\gamma})\eta^2] \sum_{i=1}^N \mathbb{E} [\|u_t^i - \bar{u}_t\|^2 + \|v_t^i - \bar{v}_t\|^2] + 12N\zeta^2(1+\frac{1}{\gamma})(\alpha^2 + \beta^2) \\
& + 8NL_f^2(1+\frac{1}{\gamma})\eta^2 \mathbb{E} [\hat{c}^2 \|\bar{u}_t\|^2 + c^2 \|\bar{v}_t\|^2] + \frac{4N\sigma^2}{b} (1+\frac{1}{\gamma})(\alpha^2 + \beta^2) \\
& + 24L_f^2(1+\frac{1}{\gamma})(\alpha^2 + \beta^2)(Q-1) \sum_{s=s_t}^{t-1} \eta^2 \sum_{i=1}^N \mathbb{E} [\hat{c}^2 \|u_s^i - \bar{u}_s\|^2 + c^2 \|v_s^i - \bar{v}_s\|^2] \quad (41)
\end{aligned}$$

Set  $\gamma = \frac{1}{Q}$  and  $\eta \leq \frac{1}{20LQ}$

$$\begin{aligned}
(1 + \gamma) + 8L_f^2(1 + \frac{1}{\gamma})\eta^2 &\leq 1 + \frac{1}{Q} + 8L^2(1 + Q)\eta^2 \\
&\leq 1 + \frac{1}{Q} + \frac{Q + 1}{50Q^2} \\
&\leq 1 + \frac{27}{25Q}
\end{aligned} \tag{42}$$

Putting the Equation (42) in Equation (41), and considering  $\gamma = \frac{1}{Q}$  and  $c\eta \leq \frac{1}{20LQ}$ , we have

$$\begin{aligned}
&\sum_{i=1}^N \mathbb{E}[\|u_{t+1}^i - \bar{u}_{t+1}\|^2 + \|v_{t+1}^i - \bar{v}_t\|^2] \\
&\leq (1 + \frac{27}{25Q}) \sum_{i=1}^N \mathbb{E}[\|u_t^i - \bar{u}_t\|^2 + \|v_t^i - \bar{v}_t\|^2] + 8NL_f^2(1 + Q)\eta^2 \mathbb{E}[\hat{c}^2 \|\bar{u}_t\|^2 + c^2 \|\bar{v}_t\|^2] \\
&\quad + \frac{4N\sigma^2}{b}(1 + Q)(\alpha^2 + \beta^2) + 12N\zeta^2(1 + Q)(\alpha^2 + \beta^2) \\
&\quad + 24(\alpha^2 + \beta^2)L_f^2(1 + Q)(Q - 1) \sum_{s=s_tQ}^{t-1} \eta^2 \sum_{i=1}^N \mathbb{E}[\hat{c}^2 \|u_s^i - \bar{u}_s\|^2 + c^2 \|v_s^i - \bar{v}_s\|^2] \\
&\leq (1 + \frac{27}{25Q}) \sum_{i=1}^N \mathbb{E}[\|u_t^i - \bar{u}_t\|^2 + \|v_{t,i} - \bar{v}_t\|^2] + \frac{4NL\eta}{5} \mathbb{E}[\hat{c}^2 \|\bar{u}_t\|^2 + c^2 \|\bar{v}_t\|^2] \\
&\quad + \frac{2N\sigma^2(c_1^2 + c_2^2)}{5bL} \eta^3 + \frac{6N\zeta^2(c_1^2 + c_2^2)}{5L} \eta^3 \\
&\quad + 24L_f^2Q^2(c_1^2 + c_2^2)\eta^4 \sum_{s=s_tQ}^{t-1} \eta^2 \sum_{i=1}^N \mathbb{E}[\hat{c}^2 \|u_s^i - \bar{u}_s\|^2 + c^2 \|v_s^i - \bar{v}_s\|^2]
\end{aligned} \tag{43}$$

When  $\text{mod}(t, Q) = 0$  (i.e.  $t = s_tQ$ ),  $\sum_{i=1}^N \|u_t^i - \bar{u}_t\|^2 = 0$  and  $\sum_{i=1}^N \|v_t^i - \bar{v}_t\|^2 = 0$ . Applying (43) recursively, we get

$$\begin{aligned}
&\sum_{i=1}^N \mathbb{E}[\|u_{t+1}^i - \bar{u}_{t+1}\|^2 + \|v_{t+1}^i - \bar{v}_{t+1}\|^2] \\
&\leq \frac{4NL}{5} \sum_{s=s_tQ}^t (1 + \frac{27}{25Q})^{t-s} \eta \mathbb{E}[\|\hat{c}\bar{u}_s\|^2 + \|c\bar{v}_s\|^2] + \frac{(2N\sigma^2 + 6N\zeta^2b)(c_1^2 + c_2^2)}{5bL} \sum_{s=s_tQ}^t (1 + \frac{27}{25Q})^{t-s} \eta^3 \\
&\quad + 24L_f^2Q^2(c_1^2 + c_2^2) \sum_{s=s_tQ}^t (1 + \frac{27}{25Q})^{t-s} \eta^4 \sum_{\bar{s}=s_tQ}^s \eta_s^2 \sum_{i=1}^N \mathbb{E}[\hat{c}^2 \|(u_{\bar{s},i} - \bar{u}_{\bar{s}})\|^2 + c^2 \|(v_{\bar{s},i} - \bar{v}_{\bar{s}})\|^2] \\
&\leq \frac{4NL}{5} \sum_{s=s_tQ}^t (1 + \frac{27}{25Q})^Q \eta \mathbb{E}[\|\hat{c}\bar{u}_s\|^2 + \|c\bar{v}_s\|^2] + \frac{(2N\sigma^2 + 6N\zeta^2b)(c_1^2 + c_2^2)}{5bL} \sum_{s=s_tQ}^t \left(1 + \frac{27}{25Q}\right)^Q \eta^3 \\
&\quad + 24L_f^2Q^3(c_1^2 + c_2^2) \left(\frac{1}{20LQ}\right)^5 (1 + \frac{27}{25Q})^Q \sum_{s=s_tQ}^t \eta \sum_{i=1}^N \mathbb{E}[\hat{c}^2 \|u_s^i - \bar{u}_s\|^2 + c^2 \|v_s^i - \bar{v}_s\|^2] \\
&\leq 3NL \sum_{s=s_tQ}^t \eta \mathbb{E}[\hat{c}^2 \|\bar{u}_s\|^2 + c^2 \|\bar{v}_s\|^2] + \frac{(6N\sigma^2 + 18N\zeta^2b)(c_1^2 + c_2^2)}{5bL} \sum_{s=s_tQ}^t \eta^3 \\
&\quad + 72L_f^2Q^3(c_1^2 + c_2^2) \left(\frac{1}{20LQ}\right)^5 \sum_{s=s_tQ}^t \eta \sum_{i=1}^N \mathbb{E}[\hat{c}^2 \|u_s^i - \bar{u}_s\|^2 + c^2 \|v_s^i - \bar{v}_s\|^2]
\end{aligned} \tag{44}$$

where the third inequality is due to  $(1 + 27/25q)^Q \leq e^{27/25} \leq 3$ . Multiplying  $\eta$  on both side and summing over  $[s_t Q, \bar{s}]$  in one inner loop, we have

$$\begin{aligned}
& \sum_{t=s_t Q}^{\bar{s}} \eta \sum_{i=1}^N \mathbb{E}[\|u_{t+1}^i - \bar{u}_{t+1}\|^2 + \|v_{t+1}^i - \bar{v}_{t+1}\|^2] \\
& \leq 3NL \sum_{t=s_t Q}^{\bar{s}} \eta \sum_{s=s_t Q}^t \eta \mathbb{E}[\|\hat{c}\bar{u}_s\|^2 + \|c\bar{v}_s\|^2] + \frac{(6N\sigma^2 + 18N\zeta^2 b)(c_1^2 + c_2^2)}{5bL} \sum_{t=s_t Q}^{\bar{s}} \eta \sum_{s=s_t Q}^t \eta^3 \\
& \quad + 72L_f^2 Q^3 (c_1^2 + c_2^2) \left(\frac{1}{20LQ}\right)^5 \sum_{t=s_t Q}^{\bar{s}} \eta \sum_{s=s_t Q}^t \eta \sum_{i=1}^N \mathbb{E}[\|u_s^i - \bar{u}_s\|^2 + \|v_s^i - \bar{v}_s\|^2] \\
& \leq 3NL \left(\sum_{t=s_t Q}^{\bar{s}} \eta\right) \sum_{t=s_t Q}^{\bar{s}} \eta \mathbb{E}[\hat{c}^2 \|\bar{u}_t\|^2 + c^2 \|\bar{v}_t\|^2] + \frac{(6N\sigma^2 + 18N\zeta^2 b)(c_1^2 + c_2^2)}{5bL} \left(\sum_{t=s_t Q}^{\bar{s}} \eta\right) \sum_{t=s_t Q}^{\bar{s}} \eta^3 \\
& \quad + 72L_f^2 Q^3 (c_1^2 + c_2^2) \left(\frac{1}{20LQ}\right)^5 \left(\sum_{t=s_t Q}^{\bar{s}} \eta\right) \sum_{t=s_t Q}^{\bar{s}} \eta \sum_{i=1}^N \mathbb{E}[\hat{c}^2 \|u_t^i - \bar{u}_t\|^2 + c^2 \|v_t^i - \bar{v}_t\|^2] \\
& \leq \frac{N}{5} \sum_{t=s_t Q}^{\bar{s}} \eta \mathbb{E}[\hat{c}^2 \|\bar{u}_t\|^2 + c^2 \|\bar{v}_t\|^2] + \left[\frac{2N\sigma^2(c_1^2 + c_2^2)}{25bL^2} + \frac{N\zeta^2(c_1^2 + c_2^2)}{5L^2}\right] \sum_{t=s_t Q}^{\bar{s}} \eta^3 \\
& \quad + \frac{72L_f^2 Q^4 (c_1^2 + c_2^2)}{(20LQ)^6} \sum_{t=s_t Q}^{\bar{s}} \eta \sum_{i=1}^N \mathbb{E}[\|u_t^i - \bar{u}_t\|^2 + \|v_t^i - \bar{v}_t\|^2] \tag{45}
\end{aligned}$$

where the last inequality holds by the fact that  $\eta \leq \frac{1}{20LQ}$ . Therefore,

$$\begin{aligned}
& [1 - 72L^2 q^4 (c_1^2 + c_2^2) \left(\frac{1}{20LQ}\right)^6] \sum_{t=s_t Q}^{\bar{s}} \eta \sum_{i=1}^N \mathbb{E}[\|u_t^i - \bar{u}_t\|^2 + \|v_t^i - \bar{v}_t\|^2] \\
& \leq \frac{N}{5} \sum_{t=s_t Q}^{\bar{s}} \eta \mathbb{E}[\hat{c}^2 \|\bar{u}_t\|^2 + c^2 \|\bar{v}_t\|^2] + \left[\frac{2N\sigma^2(c_1^2 + c_2^2)}{25bL^2} + \frac{N\zeta^2(c_1^2 + c_2^2)}{5L^2}\right] \sum_{t=s_t Q}^{\bar{s}} \eta^3 \tag{46}
\end{aligned}$$

Given that  $c_1 \leq \frac{30L^2}{bN}$  and  $c_2 \leq \frac{30L^2}{bN}$ , and  $1 - 72L^2 q^4 (c_1^2 + c_2^2) \left(\frac{1}{20LQ}\right)^6 \geq \frac{24}{25}$ . By multiply  $\frac{5}{12N}$  on both size, we have

$$\begin{aligned}
& \frac{2}{5N} \sum_{t=s_t Q}^{\bar{s}} \sum_{i=1}^N \mathbb{E}[\|u_t^i - \bar{u}_t\|^2 + \|v_t^i - \bar{v}_t\|^2] \leq \frac{1}{12} \sum_{t=s_t Q}^{\bar{s}} \mathbb{E}[\hat{c}^2 \|\bar{u}_t\|^2 + c^2 \|\bar{v}_t\|^2] \\
& \quad + \left[\frac{\sigma^2(c_1^2 + c_2^2)}{30bL^2} + \frac{\zeta^2(c_1^2 + c_2^2)}{12L^2}\right] \sum_{t=s_t Q}^{\bar{s}} \eta^2 \tag{47}
\end{aligned}$$

□

## C.2 Proof of Theorem

In this section, we show the Proof of Theorem 3.12.

*Proof.* Set  $\eta = \frac{1}{20QL}$ ,  $\alpha = c_1 \eta^2$ ,  $\beta = c_2 \eta^2$ ,  $c_1 = \frac{30L^2}{bN\kappa^{1-\nu}}$ ,  $c_2 = \frac{30L^2}{bN\kappa^{2-2\nu}}$ ,  $c = \frac{1}{6\kappa^{1-\nu}}$ ,  $\hat{c} = \frac{1}{54\kappa^{3-\nu}}$ , where  $\nu \in [0, 1]$

Recall Lemma C.2, Lemma C.4 and Lemma C.3, we have following inequalities:

$$\begin{aligned}
\mathbb{E}\Phi(\bar{x}_{t+1}) & \leq \mathbb{E}\Phi(\bar{x}_t) - \left(\frac{\hat{c}\eta}{2} - \frac{\hat{c}^2\eta^2 L}{2}\right) \mathbb{E}\|\bar{u}_{t+1}\|^2 + \frac{3\hat{c}\eta}{2} \mathbb{E}\|\bar{u}_{t+1}\| - \frac{1}{N} \sum_{i=1}^N \nabla_x f_i(x_t^i, y_t^i) \|^2 \\
& \quad - \frac{\hat{c}\eta}{2} \mathbb{E}\|\nabla\Phi(\bar{x}_t)\|^2 + \frac{3\hat{c}\eta L_f^2}{N} \sum_{i=1}^N \mathbb{E}[\|x_t^i - \bar{x}_t\|^2 + \|y_t^i - \bar{y}_t\|^2] + \frac{3\hat{c}\eta L_f^2}{\mu} [\Phi(\bar{x}_t) - F(\bar{x}_t, \bar{y}_t)]
\end{aligned}$$

$$\begin{aligned}
& \mathbb{E}\|\bar{u}_{t+1} - \nabla_x \bar{F}_t\|^2 - \mathbb{E}\|\bar{u}_t - \nabla_x \bar{F}_{t-1}\|^2 = -\alpha \mathbb{E}\|\bar{u}_t - \nabla_x \bar{F}_{t-1}\|^2 + \frac{8L_f^2}{N^2b} \sum_{i=1}^N \mathbb{E}[\hat{c}^2 \eta^2 \|u_t^i - \bar{u}_t\|^2] \\
& + c^2 \eta^2 \|v_t^i - \bar{v}_t\|^2 + \frac{4L_f^2}{Nb} \mathbb{E}[\hat{c}^2 \eta^2 \|\bar{u}_t\|^2 + c^2 \eta^2 \|\bar{v}_t\|^2] + \frac{2\alpha^2 \sigma^2}{Nb} \\
& \mathbb{E}\|\bar{v}_{t+1} - \nabla_y \bar{F}_t\|^2 - \mathbb{E}\|\bar{v}_t - \nabla_y \bar{F}_{t-1}\|^2 = -\beta \mathbb{E}\|\bar{v}_t - \nabla_y \bar{F}_{t-1}\|^2 + \frac{8L_f^2}{N^2b} \sum_{i=1}^N \mathbb{E}[\hat{c}^2 \eta^2 \|u_t^i - \bar{u}_t\|^2] \\
& + c^2 \eta^2 \|v_t^i - \bar{v}_t\|^2 + \frac{4L_f^2}{Nb} \mathbb{E}[\hat{c}^2 \eta^2 \|\bar{u}_t\|^2 + c^2 \eta^2 \|\bar{v}_t\|^2] + \frac{2\beta^2 \sigma^2}{Nb} \\
& [\Phi(\bar{x}_{t+1}) - F(\bar{x}_{t+1}, \bar{y}_{t+1})] - [\Phi(\bar{x}_t) - F(\bar{x}_t, \bar{y}_t)] \\
& \leq -\frac{c\eta\mu}{2} [\Phi(\bar{x}_t) - F(\bar{x}_t, \bar{y}_t)] + \frac{\eta}{4\hat{c}} \|\hat{x}_{t+1} - \bar{x}_t\|^2 - \frac{\eta c}{4} \|\bar{v}_{t+1}\|^2 + \frac{3L_f^2 c\eta}{N} \sum_{i=1}^N \|x_t^i - \bar{x}_t\|^2 \\
& + \frac{3L_f^2 c\eta}{N} \sum_{i=1}^N \|y_t^i - \bar{y}_t\|^2 + 3c\eta \|\bar{v}_{t+1} - \nabla_y \bar{F}_t\|^2 \tag{48}
\end{aligned}$$

Next, we define a Lyapunov function, for any  $t \geq 1$ , we have  $\Gamma_t = \Phi(\bar{x}_t) + \frac{3\hat{c}\eta}{2\alpha} \|\bar{u}_{t+1} - \frac{1}{N} \sum_{i=1}^N \nabla_x F(x_t^i, y_t^i)\|^2 + \frac{6\hat{c}L_f^2}{c\mu^2} [\Phi(\bar{x}_t) - F(\bar{x}_t, \bar{y}_t)] + \frac{18\hat{c}\eta L_f^2}{\mu^2 \beta} \|\bar{v}_{t+1} - \nabla_y \bar{F}_t\|^2$ .

$$\begin{aligned}
\Gamma_{t+1} - \Gamma_t &= -\left(\frac{\hat{c}\eta}{2} - \frac{\hat{c}^2 \eta^2 L}{2}\right) \|\bar{u}_{t+1}\|^2 - \frac{\hat{c}\eta}{2} \|\nabla \Phi(\bar{x}_t)\|^2 + \frac{3\hat{c}\eta L_f^2}{N} \sum_{i=1}^N (\|x_t^i - \bar{x}_t\|^2 + \|y_t^i - \bar{y}_t\|^2) \\
& + \frac{3\hat{c}\eta L_f^2}{\mu} [\Phi(\bar{x}_t) - F(\bar{x}_t, \bar{y}_t)] + \frac{3\hat{c}\eta}{2} \|\bar{u}_{t+1}\|^2 - \frac{1}{N} \sum_{i=1}^N \|\nabla_x F(x_t^i, y_t^i)\|^2 - \frac{3\hat{c}\eta}{2} \|\bar{u}_{t+1}\|^2 - \frac{1}{N} \sum_{i=1}^N \|\nabla_x F(x_t^i, y_t^i)\|^2 \\
& + \frac{12\hat{c}\eta L_f^2}{\alpha N^2 b} \sum_{i=1}^N \mathbb{E}[\hat{c}^2 \eta^2 \|u_{t+1}^i - \bar{u}_{t+1}\|^2 + c^2 \eta^2 \|v_{t+1}^i - \bar{v}_{t+1}\|^2] + \frac{6\hat{c}\eta L_f^2}{\alpha N b} \mathbb{E}[\hat{c}^2 \eta^2 \|\bar{u}_{t+1}\|^2 + c^2 \eta^2 \|\bar{v}_{t+1}\|^2] \\
& + \frac{3\hat{c}\eta \alpha \sigma^2}{Nb} - \frac{3\hat{c}\eta L_f^2}{\mu} [\Phi(\bar{x}_t) - F(\bar{x}_t, \bar{y}_t)] + \frac{3\hat{c}^2 \eta L_f^2}{2c\mu^2} \|\bar{u}_{t+1}\|^2 - \frac{3\eta \hat{c} L_f^2}{2\mu^2} \|\bar{v}_{t+1}\|^2 \\
& + \frac{18L_f^4 \hat{c}\eta}{N\mu^2} \sum_{i=1}^N \|x_t^i - \bar{x}_t\|^2 + \frac{18L_f^4 \hat{c}\eta}{N\mu^2} \|y_t^i - \bar{y}_t\|^2 + \frac{18\hat{c}\eta L_f^2}{\mu^2} \|\bar{v}_{t+1} - \nabla_y \bar{F}_t\|^2 \\
& - \frac{18\hat{c}\eta L_f^2}{\mu^2} \mathbb{E}\|\bar{v}_{t+1} - \nabla_y \bar{F}_t\|^2 + \frac{144\hat{c}\eta L_f^4}{\beta N^2 b \mu^2} \sum_{i=1}^N \mathbb{E}[\hat{c}^2 \eta^2 \|u_{t+1}^i - \bar{u}_{t+1}\|^2 + c^2 \eta^2 \|v_{t+1}^i - \bar{v}_{t+1}\|^2] \\
& + \frac{72\hat{c}\eta L_f^4}{Nb\beta\mu^2} \mathbb{E}[\hat{c}^2 \eta^2 \|\bar{u}_{t+1}\|^2 + c^2 \eta^2 \|\bar{v}_{t+1}\|^2] + \frac{36\beta\sigma^2 \hat{c}\eta L_f^2}{Nb\mu^2} \tag{49}
\end{aligned}$$

Rearrange the terms, we have

$$\begin{aligned}
\frac{\hat{c}\eta}{2} \|\nabla \Phi(\bar{x}_t)\|^2 &= [\Gamma_t - \Gamma_{t+1}] - \left(\frac{\hat{c}\eta}{2} - \frac{\hat{c}^2 \eta^2 L}{2} - \frac{3\hat{c}^2 \eta L_f^2}{2c\mu^2} - \frac{6\hat{c}^3 \eta^3 L_f^2}{\alpha N b} - \frac{72\hat{c}^3 \eta^3 L_f^4}{Nb\beta\mu^2}\right) \|\bar{u}_{t+1}\|^2 \\
& - \left(\frac{3\eta \hat{c} L_f^2}{2\mu^2} - \frac{6\hat{c}c^2 \eta^3 L_f^2}{\alpha N b} - \frac{72\hat{c}c^2 \eta^3 L_f^4}{Nb\beta\mu^2}\right) \|\bar{v}_{t+1}\|^2 + \frac{36\beta\sigma^2 \hat{c}\eta L_f^2}{Nb\mu^2} + \frac{3\hat{c}\eta \alpha \sigma^2}{Nb} \\
& + \left(\frac{12\hat{c}\eta L_f^2}{\alpha N^2 b} + \frac{144\hat{c}\eta L_f^4}{\beta N^2 b \mu^2}\right) \sum_{i=1}^N \mathbb{E}[\hat{c}^2 \eta^2 \|u_{t+1}^i - \bar{u}_{t+1}\|^2 + c^2 \eta^2 \|v_{t+1}^i - \bar{v}_{t+1}\|^2] \\
& + \left(\frac{18L_f^4 \hat{c}\eta}{N\mu^2} + \frac{3\hat{c}\eta L_f^2}{N}\right) \sum_{i=1}^N (\|x_t^i - \bar{x}_t\|^2 + \|y_t^i - \bar{y}_t\|^2) \tag{50}
\end{aligned}$$

Taking the (50) telescoping sum over  $t$  from  $s_t$  to  $(s_t + 1)Q$ , we have

$$\begin{aligned}
& \sum_{t=s_t}^{(s_t+1)Q-1} \|\nabla\Phi(\bar{x}_t)\|^2 \\
& \leq \sum_{t=s_t}^{(s_t+1)Q-1} \frac{2[\Gamma_t - \Gamma_{t+1}]}{\hat{c}\eta} - \left(1 - \hat{c}\eta L - \frac{3\hat{c}L_f^2}{c\mu^2} - \frac{12\hat{c}^2\eta^2L_f^2}{\alpha Nb} - \frac{144\hat{c}^2\eta^2L_f^4}{Nb\beta\mu^2}\right) \sum_{t=s_t}^{(s_t+1)Q-1} \|\bar{u}_{t+1}\|^2 \\
& \quad - \left(\frac{3L_f^2}{\mu^2} - \frac{12c^2\eta^2L_f^2}{\alpha Nb} - \frac{144c^2\eta^2L_f^4}{Nb\beta\mu^2}\right) \sum_{t=s_t}^{(s_t+1)Q-1} \|\bar{v}_{t+1}\|^2 + \sum_{t=s_t}^{(s_t+1)Q-1} \left[\frac{72\beta\sigma^2L_f^2}{Nb\mu^2} + \frac{6\alpha\sigma^2}{Nb}\right] \\
& \quad + \left(\frac{24L_f^2}{\alpha N^2b} + \frac{288L_f^4}{\beta N^2b\mu^2}\right) \sum_{t=s_t}^{(s_t+1)Q-1} \sum_{i=1}^N \mathbb{E}[\hat{c}^2\eta^2\|u_{t+1}^i - \bar{u}_{t+1}\|^2 + c^2\eta^2\|v_{t+1}^i - \bar{v}_{t+1}\|^2] \\
& \quad + \left(\frac{36L_f^4}{N\mu^2} + \frac{6L_f^2}{N}\right) \sum_{t=s_t}^{(s_t+1)Q-1} \sum_{i=1}^N [\|x_t^i - \bar{x}_t\|^2 + \|y_t^i - \bar{y}_t\|^2] \\
& \leq \sum_{t=s_t}^{(s_t+1)Q-1} \frac{2[\Gamma_t - \Gamma_{t+1}]}{\hat{c}\eta} - \left(1 - \hat{c}\eta L - \frac{3\hat{c}L_f^2}{c\mu^2} - \frac{12\hat{c}^2\eta^2L_f^2}{\alpha Nb} - \frac{144\hat{c}^2\eta^2L_f^4}{Nb\beta\mu^2}\right) \sum_{t=s_t}^{(s_t+1)Q-1} \|\bar{u}_{t+1}\|^2 \\
& \quad - \left(\frac{3L_f^2}{\mu^2} - \frac{12c^2\eta^2L_f^2}{\alpha Nb} - \frac{144c^2\eta^2L_f^4}{Nb\beta\mu^2}\right) \sum_{t=s_t}^{(s_t+1)Q-1} \|\bar{v}_{t+1}\|^2 + \sum_{t=s_t}^{(s_t+1)Q-1} \left[\frac{72\beta\sigma^2L_f^2}{Nb\mu^2} + \frac{6\alpha\sigma^2}{Nb}\right] \\
& \quad + \left(\frac{24L_f^2}{\alpha N^2b} + \frac{288L_f^4}{\beta N^2b\mu^2}\right) \sum_{t=s_t}^{(s_t+1)Q-1} \sum_{i=1}^N \mathbb{E}[\hat{c}^2\eta^2\|u_{t+1}^i - \bar{u}_{t+1}\|^2 + c^2\eta^2\|v_{t+1}^i - \bar{v}_{t+1}\|^2] \\
& \quad + \frac{(\frac{36L_f^4}{\mu^2} + 6L_f^2)(Q-1)(q \times \frac{1}{20QL} \times \frac{1}{20QL})}{N} \sum_{t=s_t}^{(s_t+1)Q-1} \sum_{i=1}^N \left[\hat{c}^2 \sum_{i=1}^N \mathbb{E}\|u_{t+1,i} - \bar{u}_{t+1}\|^2 + c^2 \mathbb{E}\|v_{t+1}^i - \bar{v}_{t+1}\|^2\right]
\end{aligned}$$

where the last inequality holds dues to (40) and  $\eta \leq \frac{1}{20QL}$ . Then summing over all the restarts and divide by the  $T$  on the bothe size, we have

$$\begin{aligned}
& \frac{1}{T} \sum_{t=0}^{T-1} \mathbb{E} \|\nabla\Phi(\bar{x}_t)\|^2 \\
& \leq \frac{2[\Gamma_0 - \Gamma_T]}{\hat{c}\eta T} - \left(1 - \hat{c}\eta L - \frac{3\hat{c}L_f^2}{c\mu^2} - \frac{12L_f^2\eta^2\hat{c}^2}{Nb\alpha} - \frac{144\hat{c}^2\eta^2L_f^4}{Nb\beta\mu^2}\right) \frac{1}{T} \sum_{t=0}^{T-1} \|\bar{u}_{t+1}\|^2 \\
& \quad - \left(\frac{3L_f^2}{\mu^2} - \frac{12L_f^2\eta^2c^2}{Nb\alpha} - \frac{144c^2\eta^2L_f^4}{Nb\beta\mu^2}\right) \frac{1}{T} \sum_{t=0}^{T-1} \|\bar{v}_{t+1}\|^2 + \frac{6\alpha\sigma^2}{Nb} + \frac{72\beta\sigma^2L_f^2}{Nb\mu^2} \\
& \quad + \left(\frac{24L_f^2\eta^2}{Nb\alpha} + \frac{288L_f^4\eta^2}{Nb\beta\mu^2} + \frac{3 + 18\kappa^2}{200}\right) \frac{1}{NT} \sum_{t=1}^T \sum_{i=1}^N \left[\hat{c}^2 \sum_{i=1}^N \mathbb{E}\|u_{t+1}^i - \bar{u}_{t+1}\|^2 + c^2 \mathbb{E}\|v_{t+1}^i - \bar{v}_{t+1}\|^2\right] \\
& \leq \frac{2[\Gamma_0 - \Gamma_T]}{\hat{c}\eta T} - \left(1 - \hat{c}\eta L - \frac{3\hat{c}L_f^2}{c\mu^2} - \frac{12L_f^2\eta^2\hat{c}^2}{Nb\alpha} - \frac{144\hat{c}^2\eta^2L_f^4}{Nb\beta\mu^2} - \frac{\hat{c}^2\kappa^2}{12}\right) \frac{1}{T} \sum_{t=0}^{T-1} \|\bar{u}_{t+1}\|^2 \\
& \quad - \left(\frac{3L_f^2}{\mu^2} - \frac{12L_f^2\eta^2c^2}{Nb\alpha} - \frac{144c^2\eta^2L_f^4}{Nb\beta\mu^2} - \frac{c^2\kappa^2}{12}\right) \frac{1}{T} \sum_{t=0}^{T-1} \|\bar{v}_{t+1}\|^2 + \frac{6\alpha\sigma^2}{Nb} + \frac{72\beta\sigma^2L_f^2}{Nb\mu^2} \\
& \quad + \left[\frac{\sigma^2(c_1^2 + c_2^2)}{30bL^2} + \frac{\zeta^2(c_1^2 + c_2^2)}{12L^2}\right] \kappa^2\eta^2
\end{aligned} \tag{51}$$



where last inequality holds due to Lemma C.5 and the fact that  $\alpha = c_1\eta^2, \beta = c_2\eta^2, c_1 = \frac{30L^2}{bN\kappa^{1-\nu}}, c_2 = \frac{30L^2}{bN\kappa^{2-2\nu}}, c = \frac{1}{6\kappa^{1-\nu}}, \hat{c} \leq \frac{1}{54\kappa^{3-\nu}}$ , where  $\nu \in [0, 1], \kappa > 1$ . Therefore,  $\left(\frac{24L_f^2\eta^2}{Nb\alpha} + \frac{288\kappa^2L_f^2\eta^2}{Nb\beta} + \frac{3+18\kappa^2}{200}\right) \max\{\hat{c}^2, c^2\} \leq \frac{24}{30 \times 36} + \frac{288\kappa^2}{30 \times 36} + \frac{3}{200 \times 36} + \frac{18\kappa^{2\nu}}{200 \times 36} \leq \frac{2}{5}\kappa^2$ .

Furthermore, for the second term in the (51),  $\eta \leq \frac{1}{20QL}$ , then  $1 - \hat{c}\eta L - \frac{3\hat{c}L_f^2}{c\mu^2} - \frac{12L_f^2\eta^2\hat{c}^2}{Nb\alpha} - \frac{144\hat{c}^2\eta^2L_f^4}{Nb\beta\mu^2} - \frac{\hat{c}^2\kappa^2}{12} \geq 1 - \frac{1}{120} - \frac{3}{9} - \frac{12}{30} - \frac{144}{30 \times 36} - \frac{1}{12 \times 36} \geq 0$  where  $\hat{c} \leq \frac{c}{9\kappa^2} = \frac{1}{54\kappa^{3-\nu}}$ . In addition, for the third term in the (51), we have  $\frac{3L_f^2}{\mu^2} - \frac{12L_f^2\eta^2c^2}{Nb\alpha} - \frac{144c^2\eta^2L_f^4}{Nb\beta\mu^2} - \frac{c^2\kappa^2}{12} \geq 3\kappa^2 - \frac{12}{30 \times 36} - \frac{144\kappa^2}{30 \times 36} - \frac{\kappa^{2\nu}}{12 \times 36} \geq 0$

$$\begin{aligned}
& \frac{1}{T} \sum_{t=0}^{T-1} \mathbb{E} \|\nabla\Phi(\bar{x}_t)\|^2 \\
& \leq \frac{2[\Phi(\bar{x}_0) - \Phi(\bar{x}_T)]}{\hat{c}\eta T} + \frac{3}{\alpha T} \mathbb{E} \|\bar{u}_1 - \nabla_x \bar{F}_0\|^2 + \frac{36L_f^2}{\mu^2\beta T} \mathbb{E} \|\bar{v}_1 - \nabla_y \bar{F}_0\|^2 + \frac{12L_f^2}{c\eta\mu^2 T} [\Phi(\bar{x}_0) - F(\bar{x}_0, \bar{y}_0)] \\
& \quad + \frac{6\alpha\sigma^2}{Nb} + \frac{72\beta\sigma^2L_f^2}{Nb\mu^2} + \left[ \frac{\sigma^2(c_1^2 + c_2^2)}{30bL^2} + \frac{\zeta^2(c_1^2 + c_2^2)}{12L^2} \right] \kappa^2\eta^2 \\
& \leq \frac{2[\Phi(\bar{x}_0) - \Phi(\bar{x}_T)]}{\hat{c}\eta T} + \frac{3\sigma^2}{\alpha TBN} + \frac{36L_f^2\sigma^2}{\mu^2\beta TBN} + \frac{12L_f^2}{c\eta\mu^2 T} [\Phi(\bar{x}_0) - F(\bar{x}_0, \bar{y}_t)] \\
& \quad + \frac{6\alpha\sigma^2}{Nb} + \frac{72\beta\sigma^2L_f^2}{Nb\mu^2} + \left[ \frac{\sigma^2(c_1^2 + c_2^2)}{30bL^2} + \frac{\zeta^2(c_1^2 + c_2^2)}{12L^2} \right] \kappa^2\eta^2 \tag{52}
\end{aligned}$$

Finally, we analyze the convergence of FedSGDA.  $b = O(\kappa^\nu)$  for  $\nu \in [0, 1], c_1 = \frac{30L^2}{bN\kappa^{1-\nu}}, c_2 = \frac{30L^2}{bN\kappa^{2-2\nu}}, c = \frac{1}{6\kappa^{1-\nu}}, \hat{c} = \frac{1}{54\kappa^{3-\nu}}, T = \kappa^{3-\nu}T_0, Q = \frac{T_0^{1/3}}{N^{2/3}}, \eta = \frac{1}{20QL} = \frac{N^{2/3}}{20LT_0^{1/3}}$ , we have  $\alpha = c_1\eta^2 = \frac{3N^{1/3}}{40T_0^{2/3}b\kappa^{1-\nu}}, \beta = c_2\eta^2 = \frac{3N^{1/3}}{40T_0^{2/3}b\kappa^{2-2\nu}}, B = \frac{T_0^{1/3}b\kappa^{1-\nu}}{N^{2/3}}$

$$\begin{aligned}
& \frac{1}{T} \sum_{t=0}^{T-1} \mathbb{E} \|\nabla\Phi(\bar{x}_t)\|^2 \\
& \leq \frac{2160L[\Phi(\bar{x}_0) - \Phi^*]}{(NT_0)^{2/3}} + \frac{40\sigma^2}{\kappa^{3-\nu}(NT_0)^{2/3}} + \frac{480\sigma^2}{\kappa^2(NT_0)^{2/3}} + \frac{240L_f}{(NT_0)^{2/3}} [\Phi(\bar{x}_0) - F(\bar{x}_0, \bar{y}_0)] \\
& \quad + \frac{9\sigma^2}{20b\kappa(NT_0)^{2/3}} + \frac{27\sigma^2}{5(NT_0)^{2/3}} + \left[ \frac{3\sigma^2}{20b} + \frac{15\zeta^2}{40} \right] \frac{1}{(NT_0)^{2/3}} \tag{53}
\end{aligned}$$

where  $\Phi^*$  is the optimal. To let the right hand is less than  $\varepsilon^2$ , we get  $T_0 = O(N^{-1}\varepsilon^{-3})$  and  $T = O(\kappa^{3-\nu}N^{-1}\varepsilon^{-3})$ . Considering the  $b = \kappa^\nu$ , Communication Complexity  $\frac{T}{Q} = \kappa^{3-\nu}(NT_0)^{2/3} = \kappa^{3-\nu}\varepsilon^{-2}$ . Sample complexity  $bT = O(\kappa^3N^{-1}\varepsilon^{-3})$ . When  $\nu = 1, b = \kappa$ , Communication Complexity  $\frac{T}{Q} = \kappa^2\varepsilon^{-2}$   $\square$

## D Experiments

### D.1 Ablation Test results

In Fair classification, we also explore the combinations of the global and local learning rates of FedSGDA+ and report the test accuracy on CIFAR-10 in 3. Results show both global and local learning rates have a significant effect on the final performance.

In AUROC maximization, we present results of Fed-SGDA-M with different momentum parameters and local update number  $Q$  in 2. When momentum parameters are 0.9 ( $1 - \alpha = 0.1$  and  $1 - \beta = 0.1$ ), we put less weight on the history information and the FedSGDA-M tends to be local SGDA. When

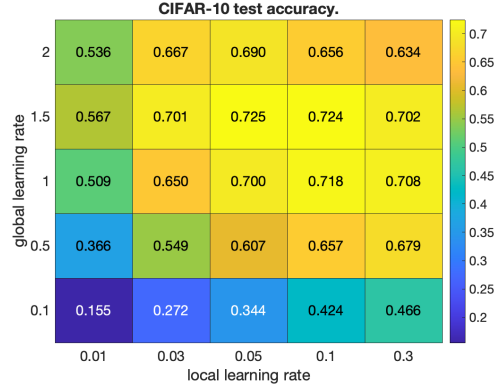

Figure 3: CIFAR-10 test accuracy on Fair Classification with various global learning rate and local learning rate  $\eta_x$  ( $\eta_y = 0.1 \eta_x$ )

the Q increase, the model performance decrease due to client drift. However, when the momentum parameter is 0.9, with the help of momentum variables, the effect of a larger local update number is reduced.

Table 2: CIFAR-10 test accuracy on AUROC maximization with various inner loop Q and momentum constant  $\alpha / \beta$

| momentum | 0.1                 | 0.3                 | 0.5                 | 0.7                 | 0.9                 |
|----------|---------------------|---------------------|---------------------|---------------------|---------------------|
| Q = 10   | 0.6115 $\pm$ 0.0055 | 0.6029 $\pm$ 0.0067 | 0.6068 $\pm$ 0.0068 | 0.6027 $\pm$ 0.0056 | 0.6006 $\pm$ 0.0070 |
| Q = 20   | 0.6104 $\pm$ 0.0040 | 0.6059 $\pm$ 0.0031 | 0.6043 $\pm$ 0.0068 | 0.5988 $\pm$ 0.0063 | 0.5912 $\pm$ 0.0085 |
| Q = 50   | 0.6109 $\pm$ 0.0069 | 0.6043 $\pm$ 0.0126 | 0.6049 $\pm$ 0.0171 | 0.6027 $\pm$ 0.0075 | 0.5874 $\pm$ 0.0093 |

## D.2 Model Architectures

Table 3: Model Architecture for Fashion-MNIST

| Layer Type             | Shape                  |
|------------------------|------------------------|
| Convolution + Tanh     | $3 \times 3 \times 5$  |
| Max Pooling            | $2 \times 2$           |
| Convolution + Tanh     | $3 \times 3 \times 10$ |
| Max Pooling            | $2 \times 2$           |
| Fully Connected + Tanh | 100                    |
| Fully Connected + Tanh | 1 / 10                 |

Table 4: Model Architecture for CIFAR-10

| Layer Type             | Shape                  | padding |
|------------------------|------------------------|---------|
| Convolution + ReLU     | $3 \times 3 \times 16$ | 1       |
| Max Pooling            | $2 \times 2$           |         |
| Convolution + ReLU     | $3 \times 3 \times 32$ | 1       |
| Max Pooling            | $2 \times 2$           |         |
| Convolution + ReLU     | $3 \times 3 \times 64$ | 1       |
| Max Pooling            | $2 \times 2$           |         |
| Fully Connected + ReLU | 512                    |         |
| Fully Connected + ReLU | 64                     |         |
| Fully Connected + ReLU | 1 / 10                 |         |
